# Supplementary material for: Novel 4-Oxoquinazoline-Based N-Hydroxypropenamides as Histone Deacetylase Inhibitors: Design, Synthesis, and Biological Evaluation
Source: PubMed Central journal article supplement — ACS Omega. 2021 Feb 8;6(7):4907–20. doi: 10.1021/acsomega.0c05870 (PMC7905942; doi:10.1021/acsomega.0c05870), 2021-02-08

# SUPPLEMENTAL MATERIALS

for

## **Novel 4-Oxoquinazoline-Based N-Hydroxypropenamides as Histone Deacetylase Inhibitors: Design, Synthesis and Biological evaluation**

Duong T. Anh,<sup>a</sup> Pham-The Hai,<sup>a</sup> Le D. Huy,<sup>a</sup> Hoang B. Ngoc,<sup>a</sup> Trinh T. M. Ngoc,<sup>a</sup> Do T. M. Dung,<sup>a</sup> Eun J. Park,<sup>b</sup> In K. Song,<sup>b</sup> Jong S. Kang,<sup>c</sup> Joo-Hee Kwon,<sup>c</sup> Truong T. Tung,<sup>d,e</sup> Sang-Bae Han<sup>b\*</sup> and Nguyen-Hai Nam<sup>a\*</sup>

<sup>a</sup>*Department of Pharmaceutical Chemistry, Hanoi University of Pharmacy, 13-15 Le Thanh Tong, Hanoi, Vietnam*

<sup>b</sup>*College of Pharmacy, Chungbuk National University, 194-31, Osongsaengmyung-1, Heungdeok, Cheongju, Chungbuk, 28160, Republic of Korea*

<sup>c</sup>*Laboratory Animal Resource Center, Korea Research Institute of Bioscience and Biotechnology, Cheongju, Chungbuk, Republic of Korea*

<sup>d</sup>*Faculty of Pharmacy, PHENIKAA University, Hanoi, 12116, Vietnam;* <sup>e</sup>*PHENIKAA Institute for Advanced Study (PIAS), PHENIKAA University, Hanoi, 12116, Vietnam*

*\*Corresponding authors*

*N.H. Nam, E-mail: [namnh@hup.edu.vn](mailto:namnh@hup.edu.vn) Tel.: +84-4-39330531, Fax: +84-4-39332332*

*S.B. Han, E-mail: [shan@chungbuk.ac.kr](mailto:shan@chungbuk.ac.kr)*

## 1. Chemistry

Thin layer chromatography which was performed using Whatman® 250 µm Silica Gel GF Uniplates and visualized under UV light at 254 and 365 nm, was used to check the progress of reactions and preliminary evaluation of compounds' homogeneity. Melting points were measured using a Gallenkamp Melting Point Apparatus (LabMerchant, London, United Kingdom) and are uncorrected. Purification of compounds was carried out using crystallization methods and/or open silica gel column flash chromatography employing Merck silica gel 60 (240 to 400 mesh) as stationary phase. Nuclear magnetic resonance spectra (<sup>1</sup>H NMR) were recorded on a Bruker 500 MHz spectrometer with DMSO-*d*<sub>6</sub> as solvent unless otherwise indicated. Tetramethylsilane was used as an internal standard. Chemical shifts are reported in parts per million (ppm), downfield from tetramethylsilane. Mass spectra with different ionization modes including electron ionization (EI), Electrospray ionization (ESI), were recorded using PE Biosystems API2000 (Perkin Elmer, Palo Alto, CA, USA) and Mariner® (Azco Biotech, Inc. Oceanside, CA, USA) mass spectrometers, respectively. The elemental (C, H, N) analyses were performed on a Perkin Elmer model 2400 elemental analyzer. All reagents and solvents were purchased from Aldrich or Fluka Chemical Corp. (Milwaukee, WI, USA) or Merck unless noted otherwise. Solvents were used directly as purchased unless otherwise indicated.

## 2. HDAC enzymes assay

The HDAC enzymes (Hela cell nuclear extract) were purchased from Enzo Life Sciences Inc. (Farmingdale, New York, USA). The HDAC enzymatic assay was performed using a Fluorogenic HDAC Assay Kit (Enzo Life Sciences Inc.) according to the manufacturer's instructions. Briefly, HDAC enzymes were incubated with vehicle or various concentrations of the assayed samples or SAHA for 30 min at 37°C in the presence of an HDAC fluorimetric substrate. The HDAC assay developer (which produces a fluorophore in reaction mixture) was added, and the fluorescence was measured using VICTOR (PerkinElmer, Waltham, MA, USA) with excitation at 360 nm and emission at 460 nm. The measured activities were subtracted by the vehicle-treated control enzyme activities and IC<sub>50</sub> values were calculated using GraphPad Prism (GraphPad Software, San Diego, CA, USA).

## 3. HDAC6 enzymes assay

The HDAC6 enzyme assay Kit were purchased from BPS Bioscience (San Diego, CA, USA). The enzymatic HDAC assay was performed according to the manufacturer's guidance. In brief, the HDAC6 enzymes were incubated with vehicle or various concentrations of test samples or SAHA for 30 min at 37°C in the presence of an HDAC fluorimetric substrate. The HDAC assay developer (which produces a fluorophore in reaction mixture) was then added,

and the fluorescence was measured using VICTOR3 (PerkinElmer, Waltham, MA, USA) with excitation at 360 nm and emission at 460 nm. The measured activities were subtracted by the vehicle-treated control enzyme activities. Calculation of IC<sub>50</sub> values were performed using GraphPad Prism (GraphPad Software, San Diego, CA, USA).

#### **4. Molecular docking studies**

London function express binding energy and affinity scoring:

The London function express binding energy (E\_score1) as a sum of interaction contributions, including the average gain or loss of rotational-translational entropy, the energy term describing the loss of ligand flexibility, H-bond energy, metal ligation energy, and the difference in desolvation energies for each atom. Meanwhile, the affinity scoring function estimate the binding energy (E\_score2) by a linear combination of the enthalpic contributions of the hydrophobic, ionic, metal ligation, atom pair and H-bond contacts. Molecular Operating Environment (MOE), Version 2009.10, Chemical Computing Group Inc., 1010 Sherbooke St. West, Suite #910, Montreal, QC, Canada, 2016. <<http://www.chemcomp.com>>

## 5. Spectra

### ALL $^1\text{H}$ & $^{13}\text{C}$ NMR SPECTRA OF THE COMPOUNDS

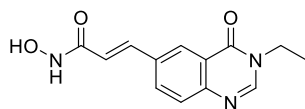

Figure S1.  $^1\text{H}$  NMR of compound 9a

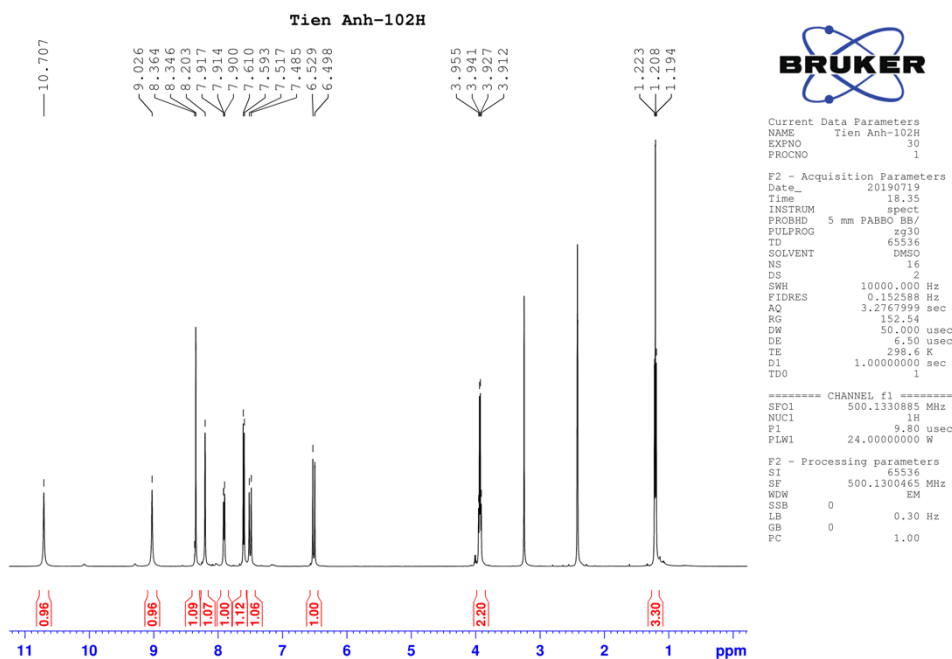

Figure S2.  $^{13}\text{C}$  NMR of compound 9a

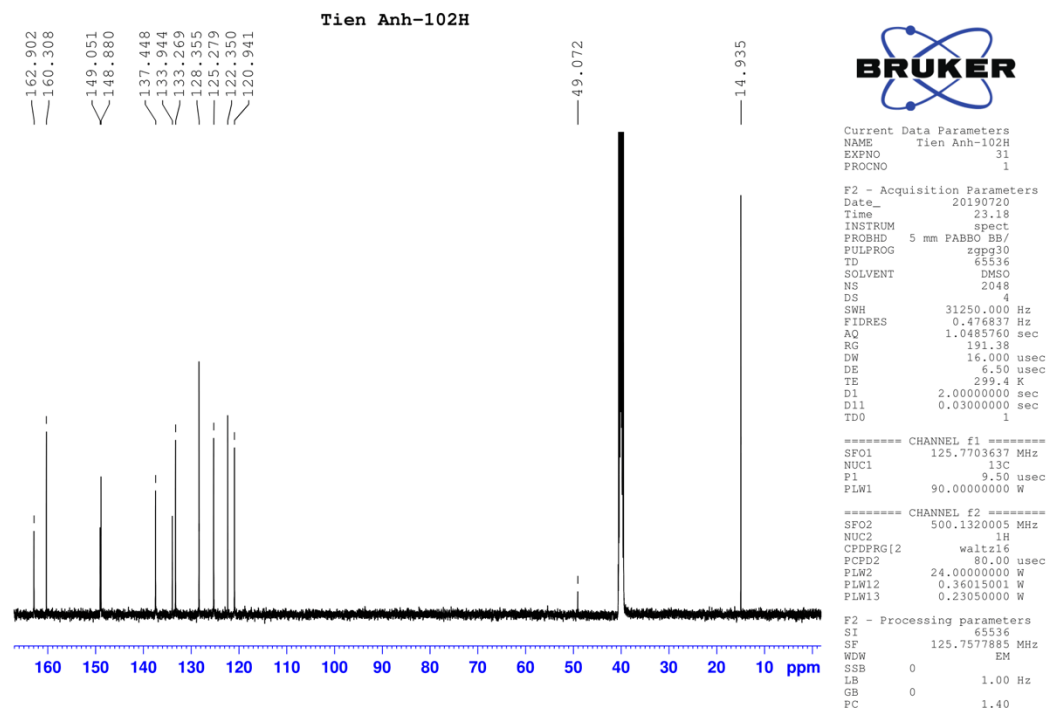

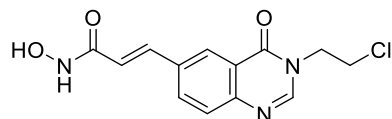

Figure S3. <sup>1</sup>H NMR of compound 9b

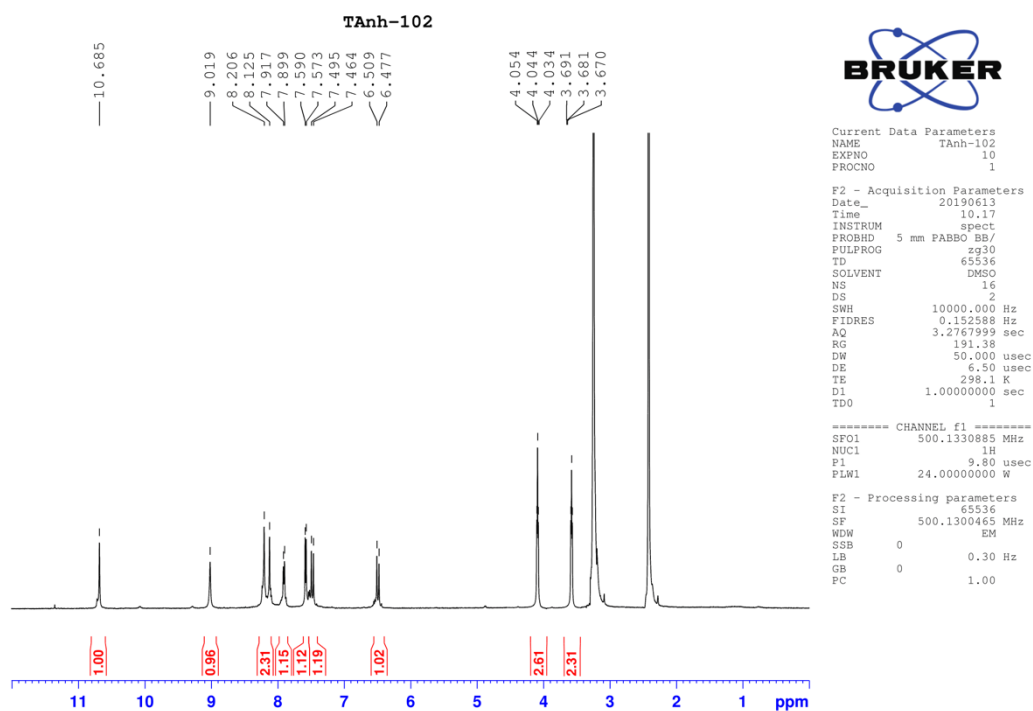

Figure S4. <sup>13</sup>C NMR of compound 9b

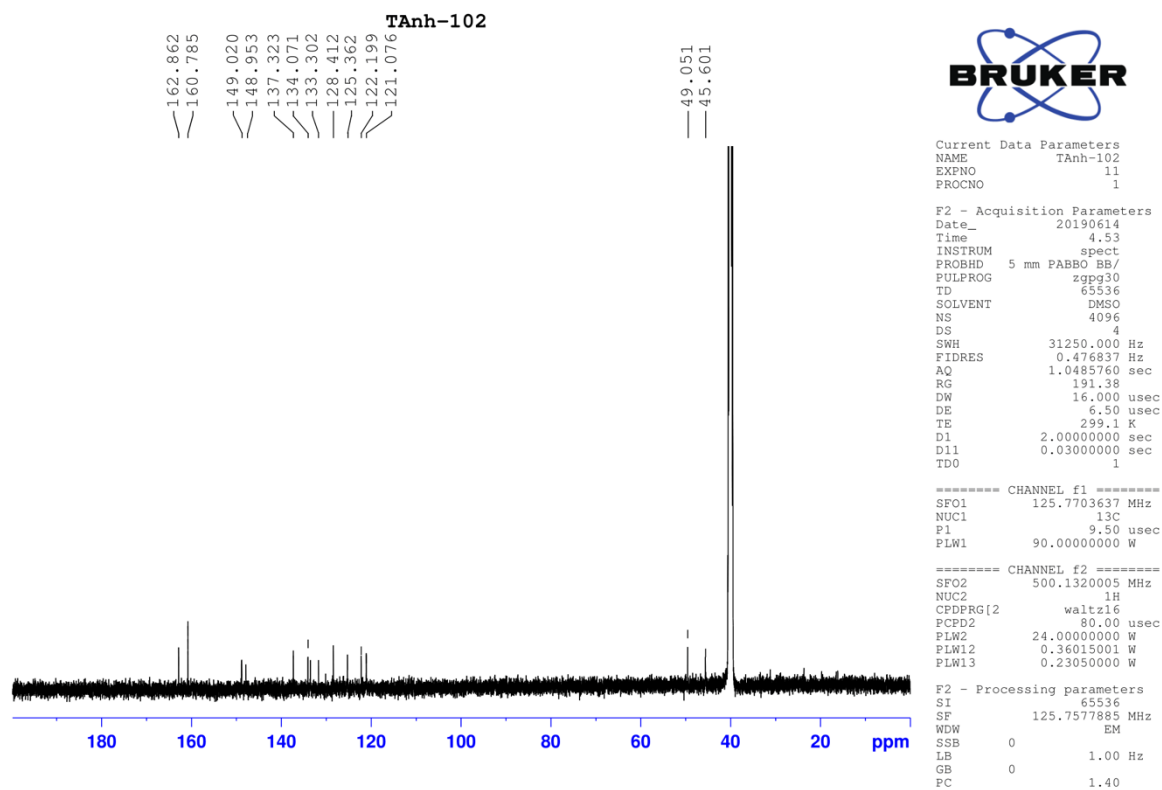

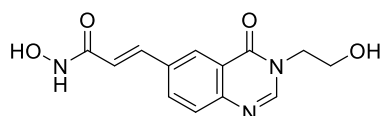

Figure S5. <sup>1</sup>H NMR of compound 9c

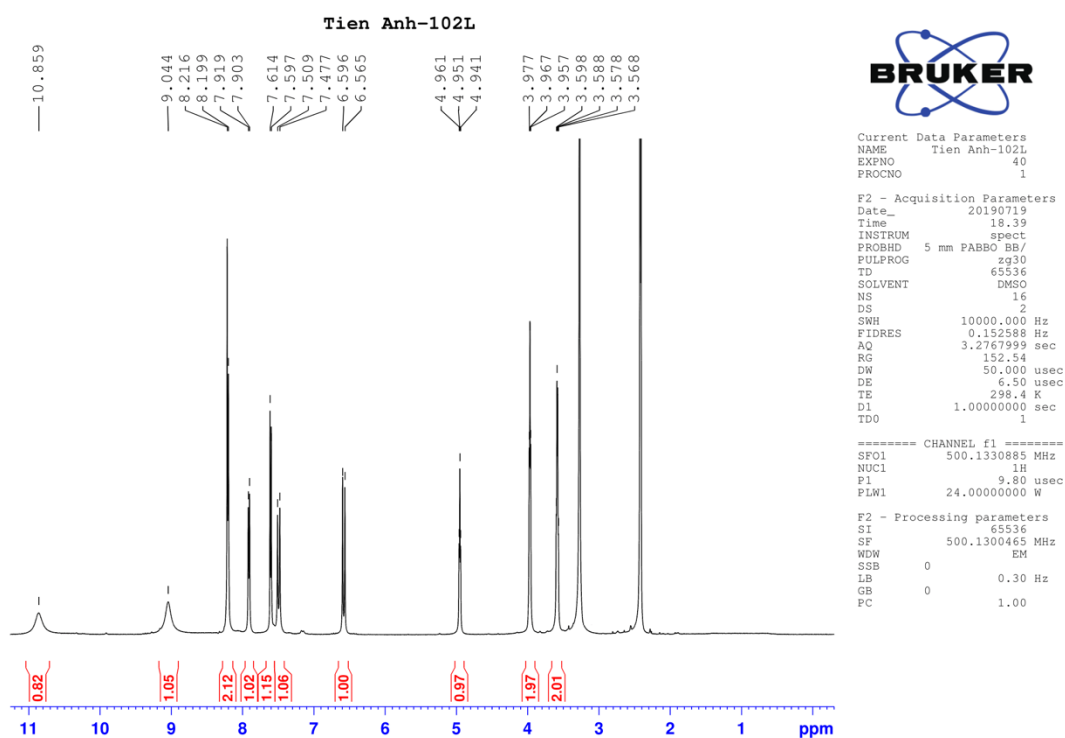

Figure S6. <sup>13</sup>C NMR of compound 9c

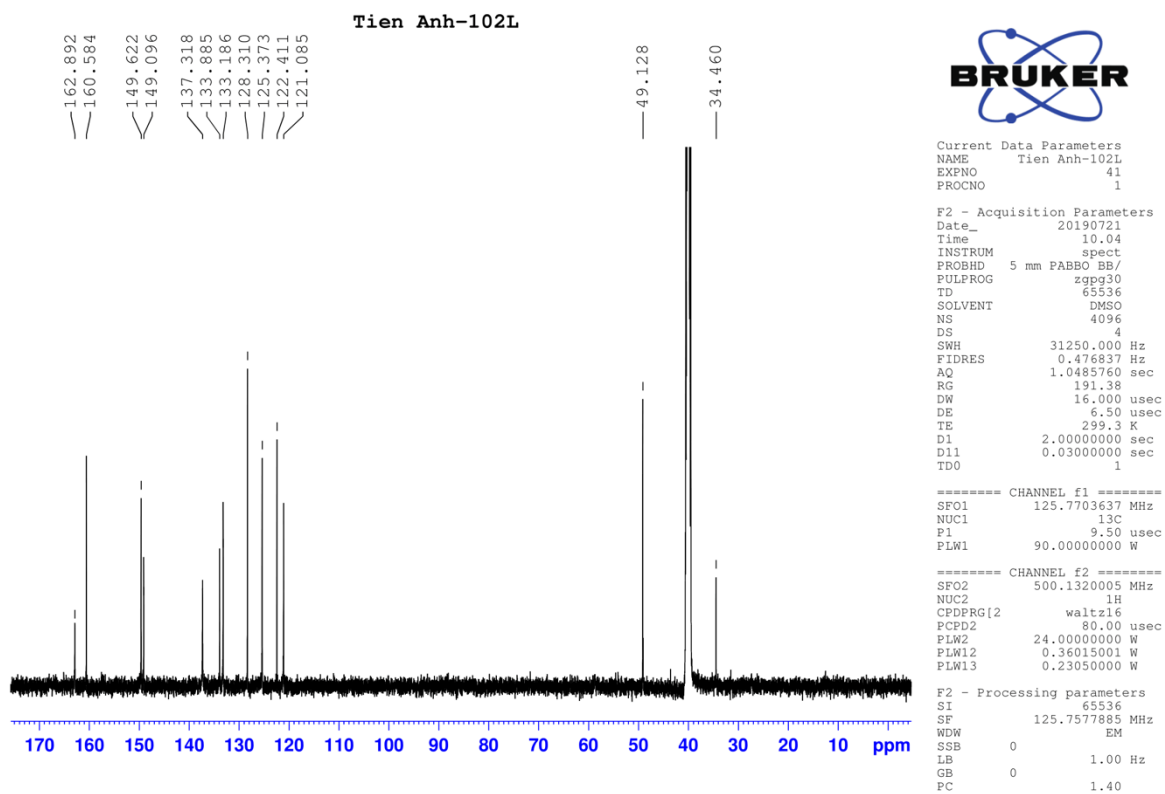

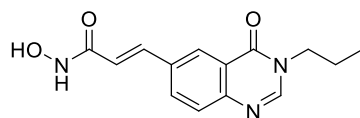

Figure S7. <sup>1</sup>H NMR of compound 9d

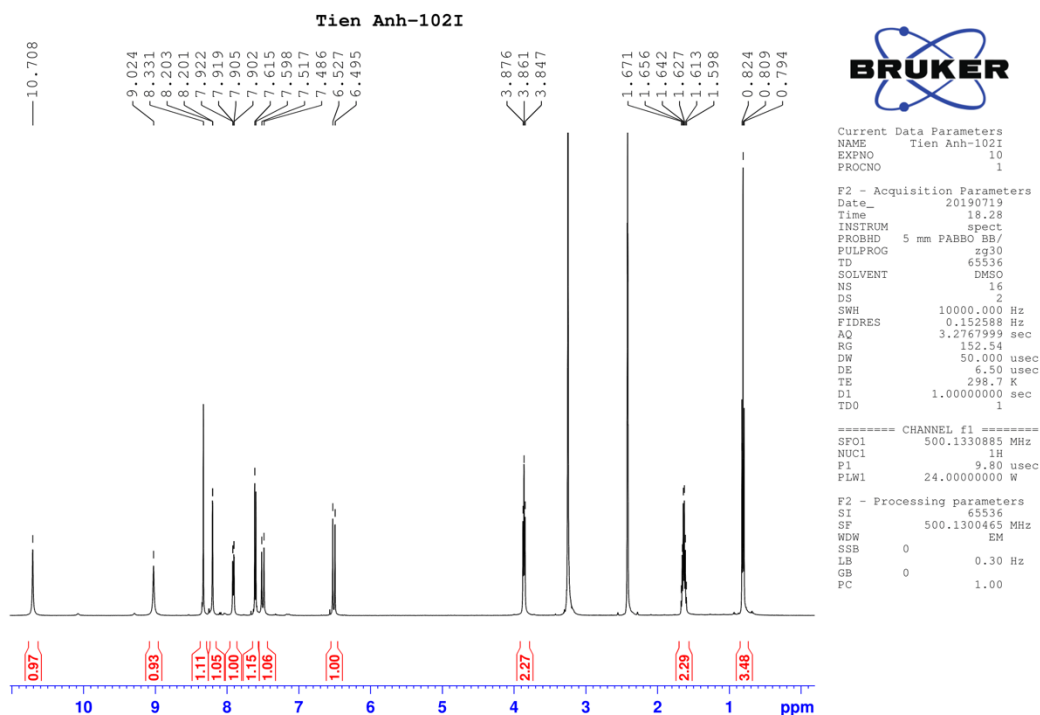

Figure S8. <sup>13</sup>C NMR of compound 9d

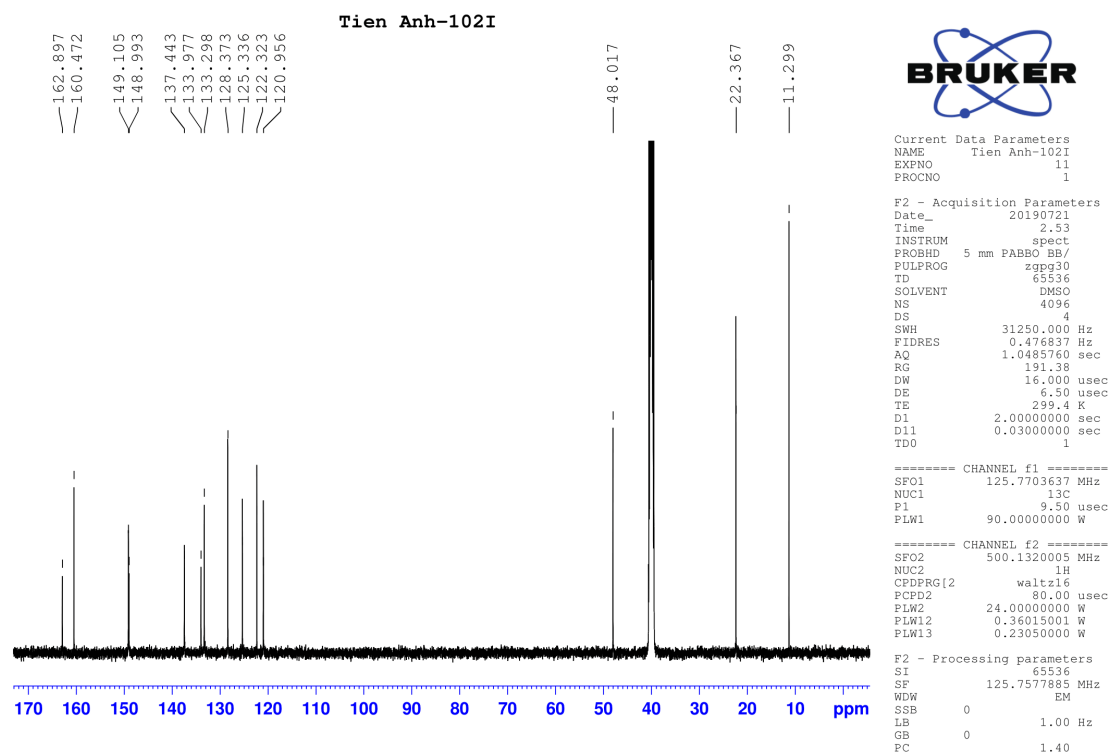

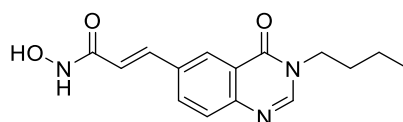

Figure S9. <sup>1</sup>H NMR of compound 9e

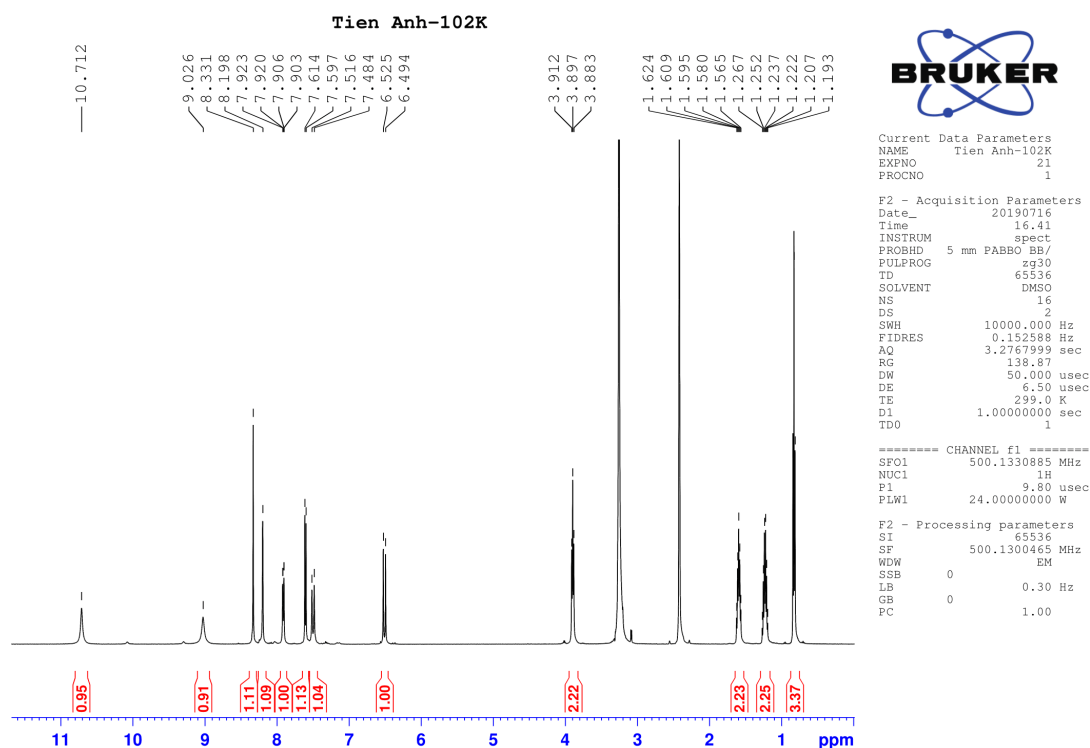

Figure S10. <sup>13</sup>C NMR of compound 9e

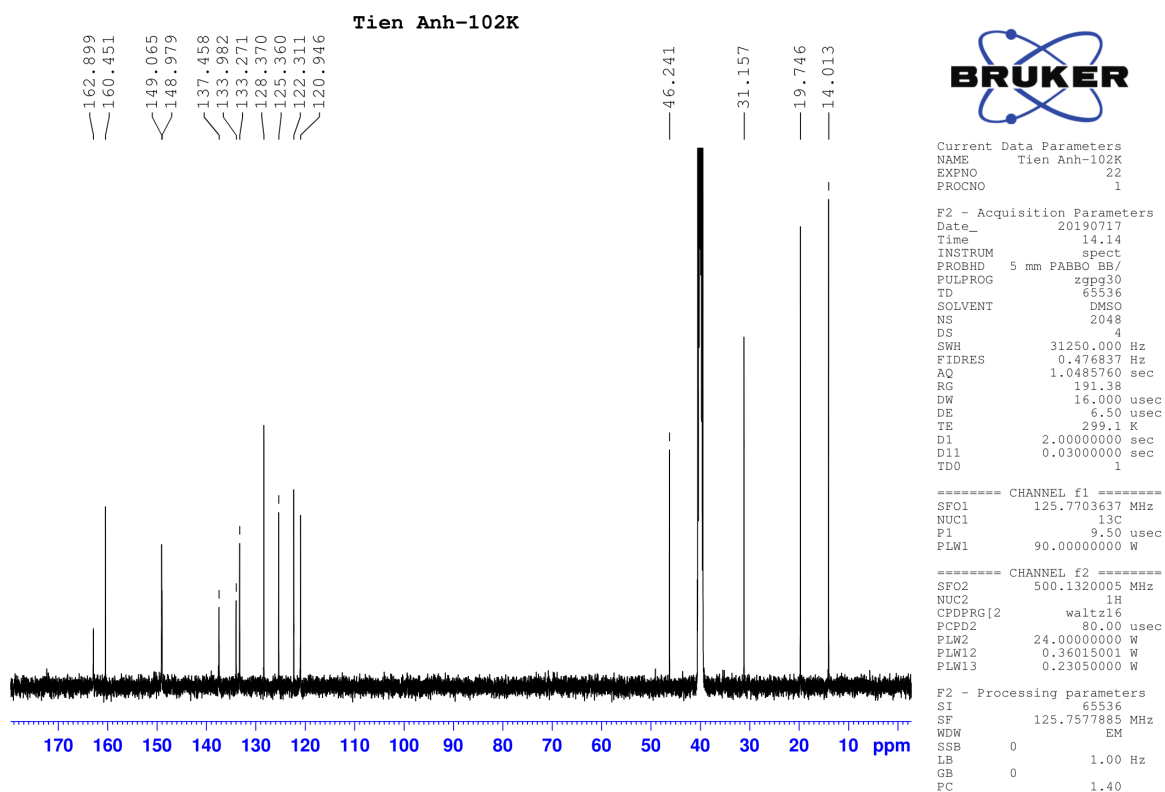



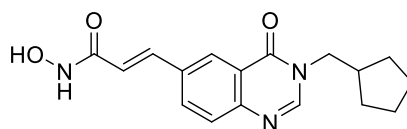

Figure S11. <sup>1</sup>H NMR of compound 9f

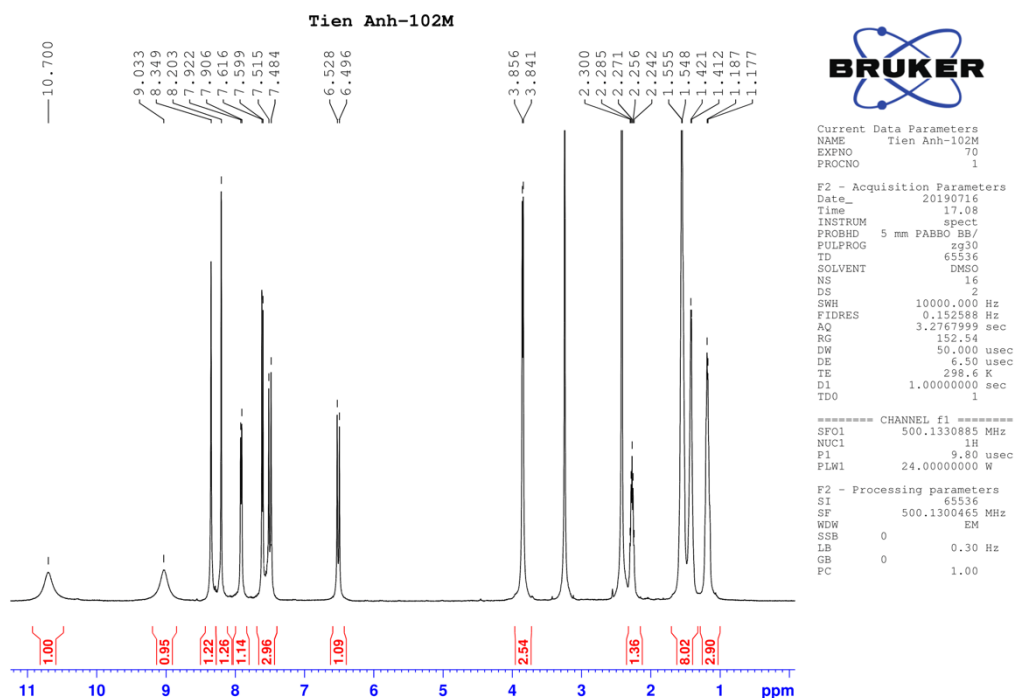

Figure S12. <sup>13</sup>C NMR of compound 9f

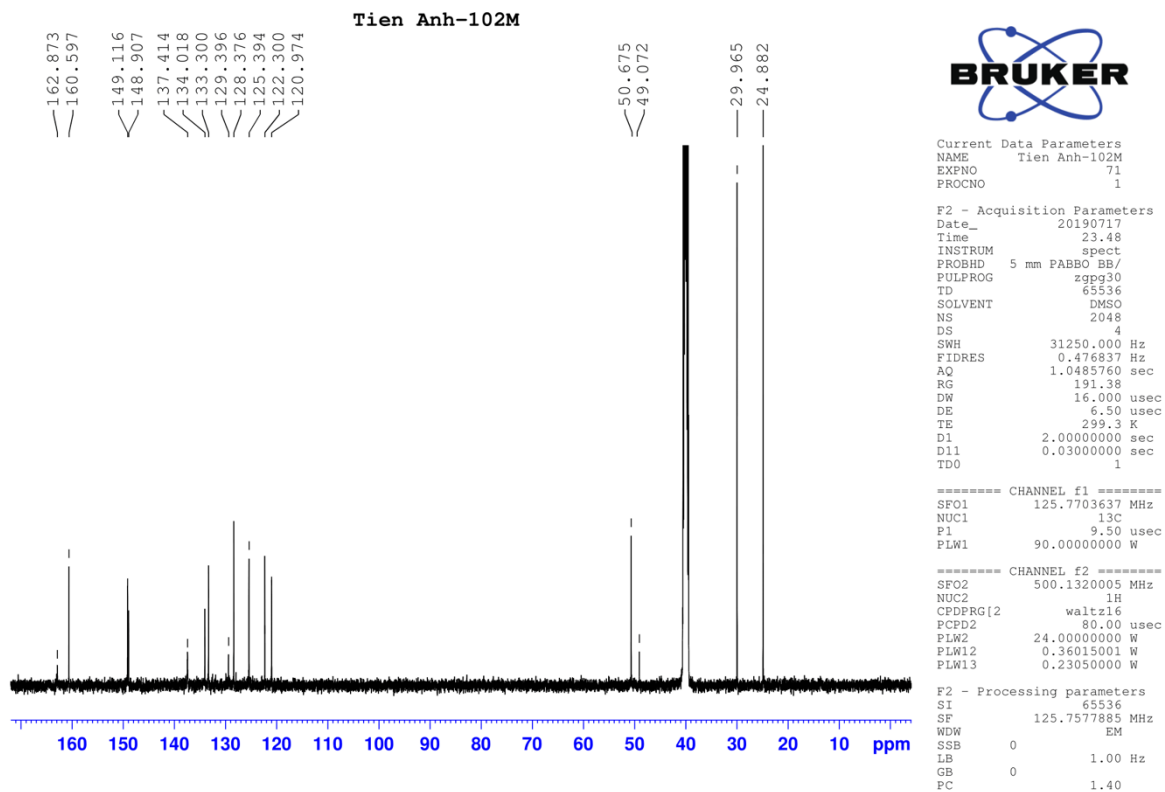

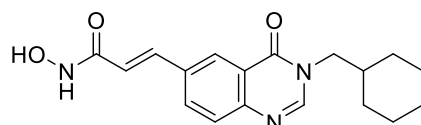

Figure S13. <sup>1</sup>H NMR of compound 9g

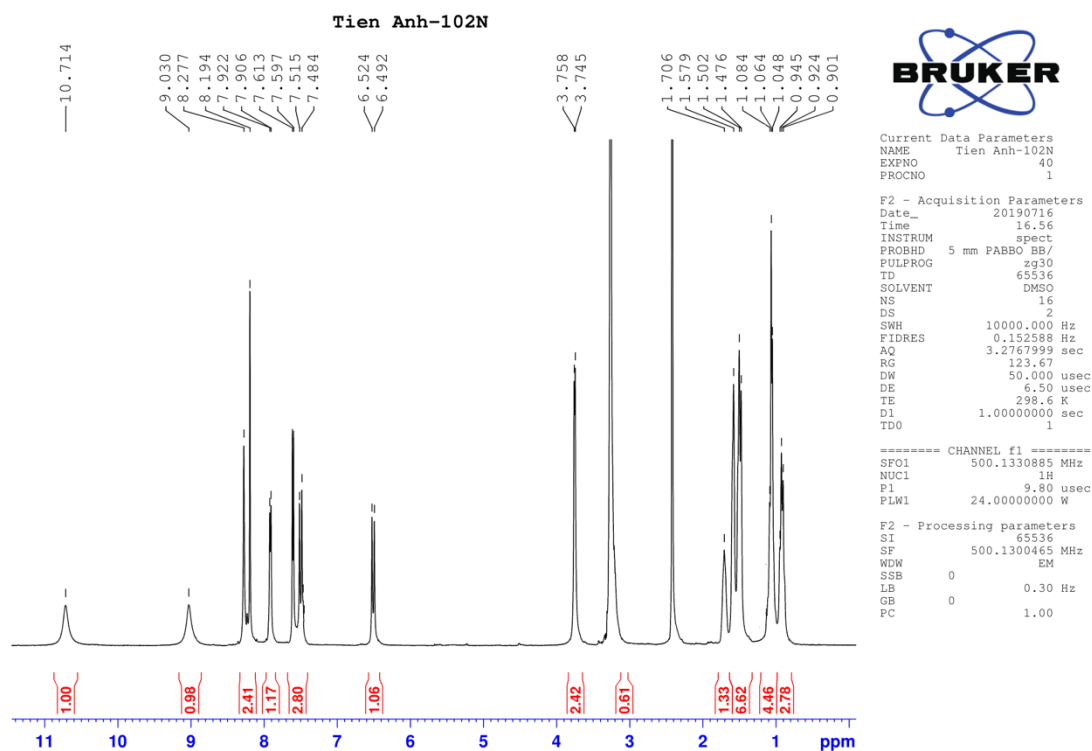

Figure S14. <sup>13</sup>C NMR of compound 9g

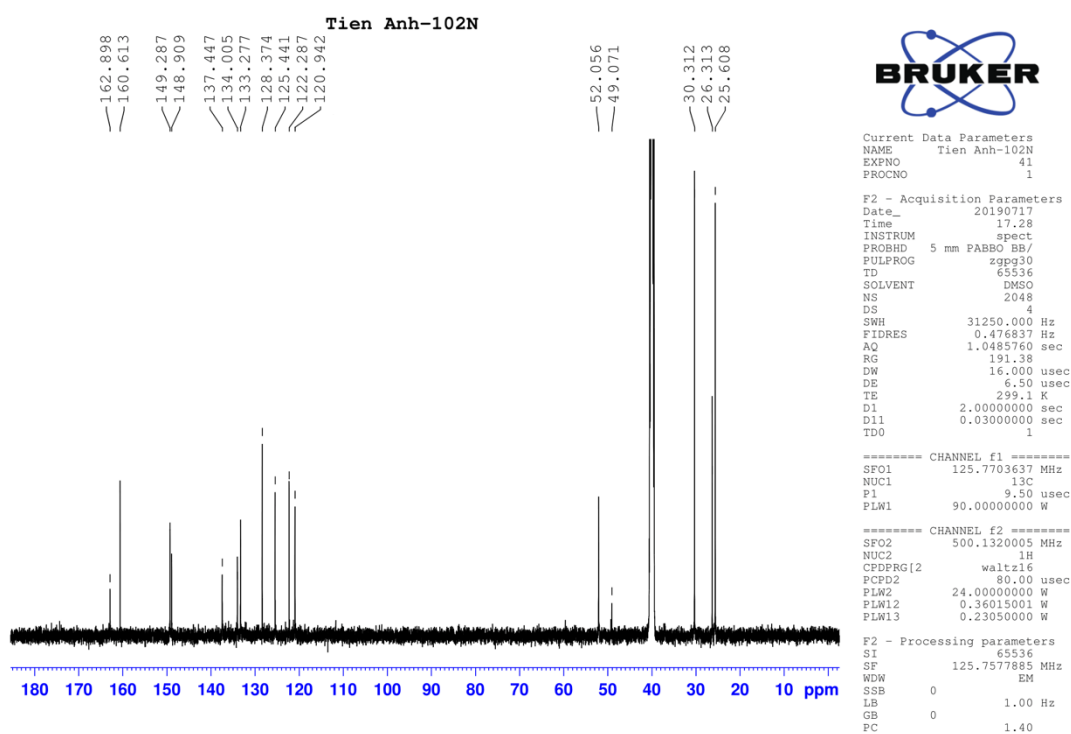

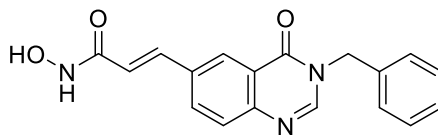

Figure S15. <sup>1</sup>H NMR of compound 9h

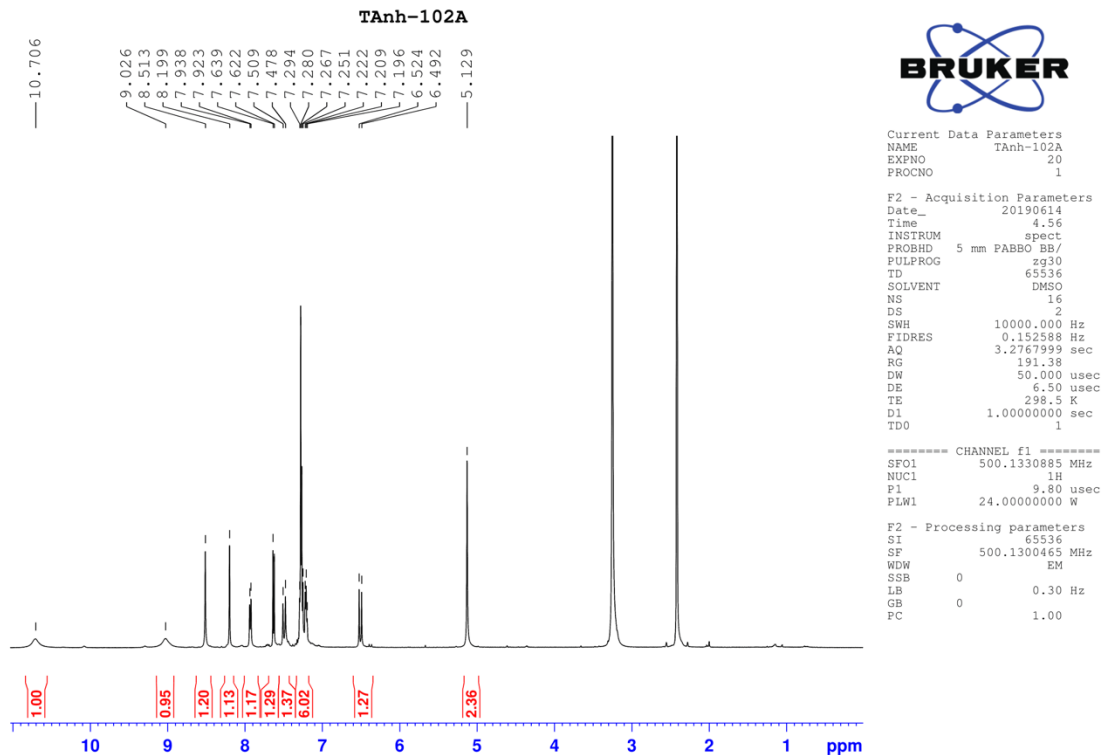

Figure S16. <sup>13</sup>C NMR of compound 9h

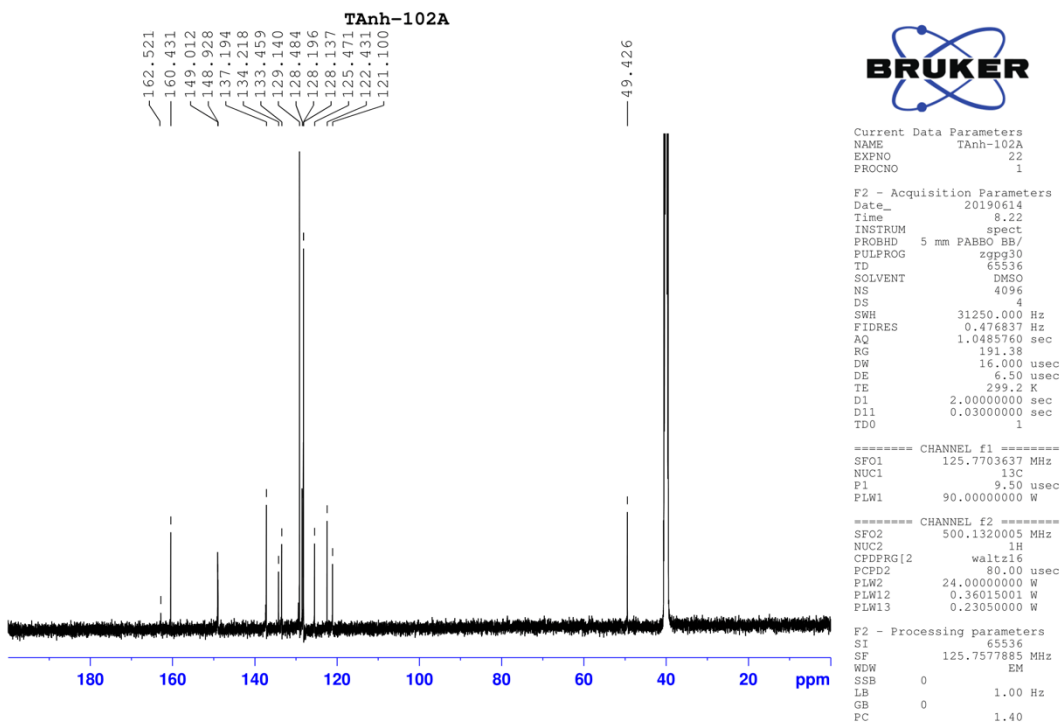

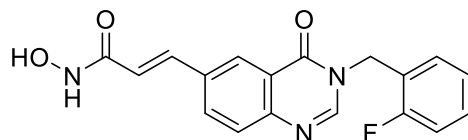

Figure S17. <sup>1</sup>H NMR of compound 9i

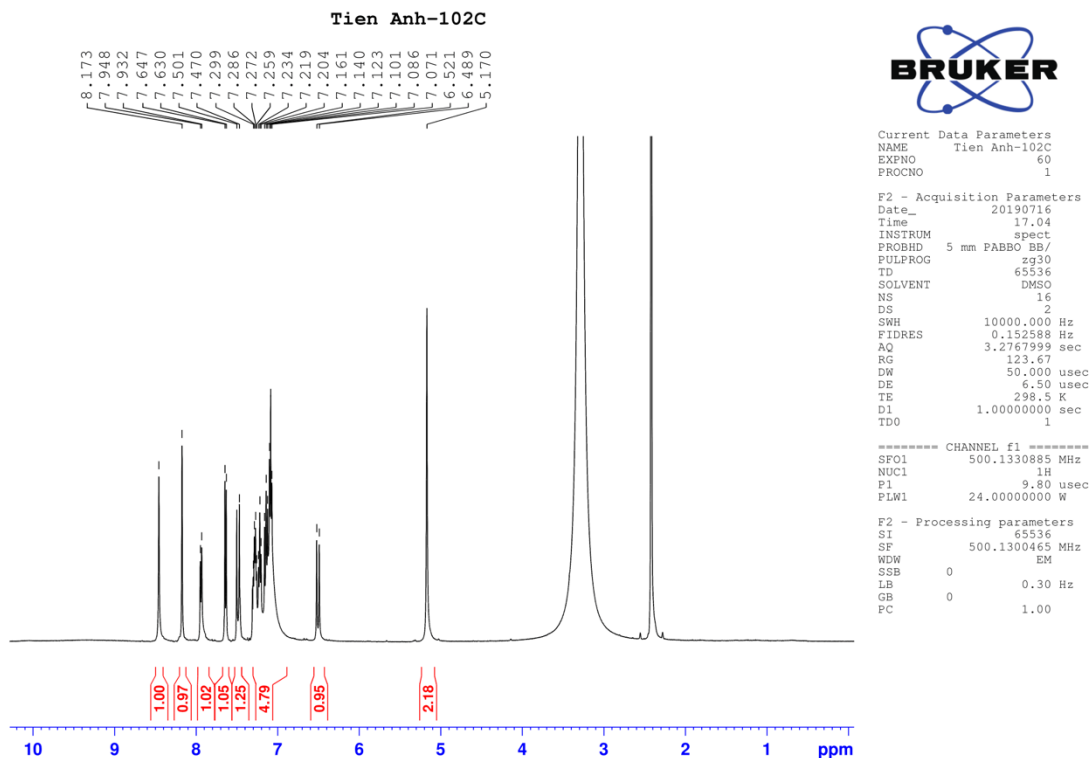

Figure S18. <sup>13</sup>C NMR of compound 9i

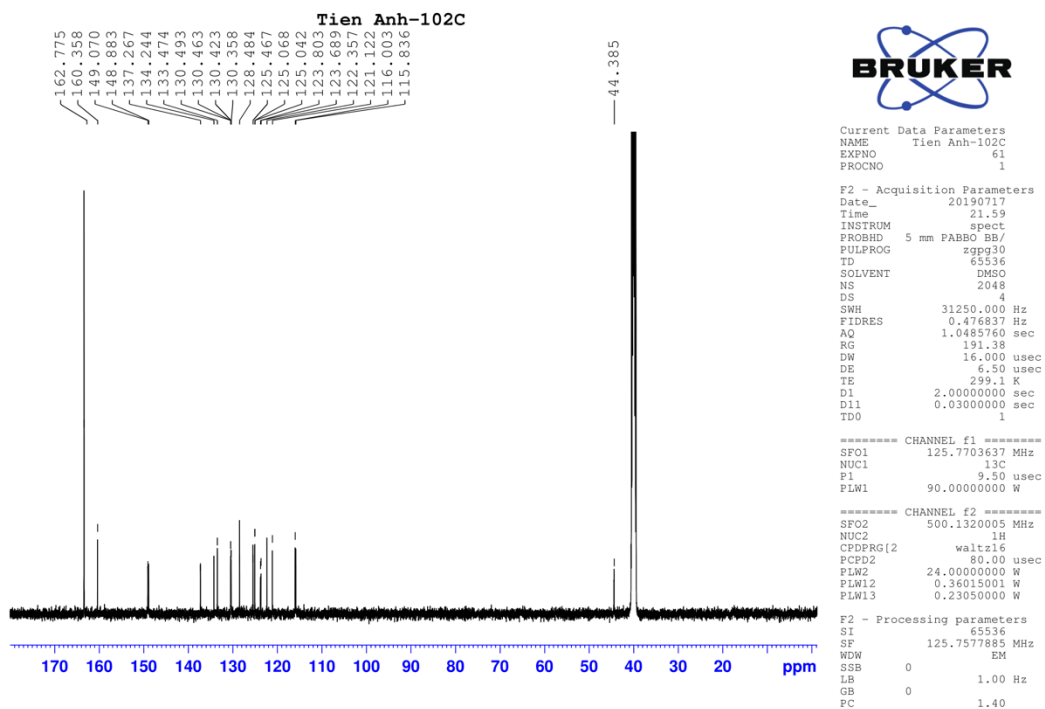

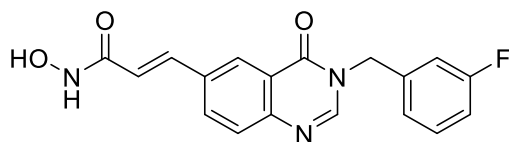

Figure S19. <sup>1</sup>H NMR of compound 9j

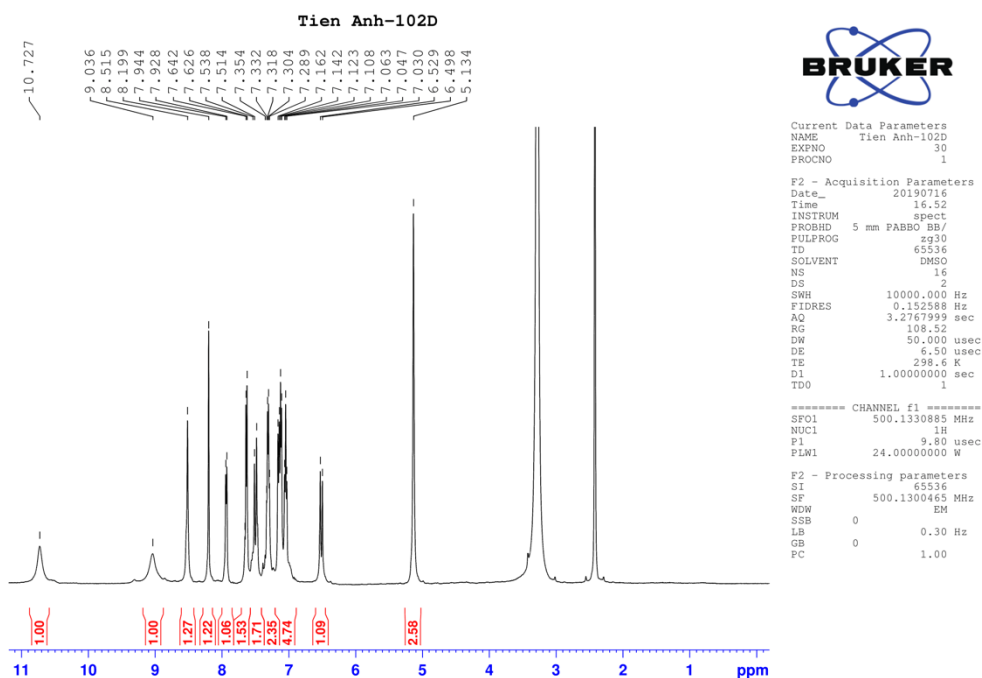

Figure S20. <sup>13</sup>C NMR of compound 9j

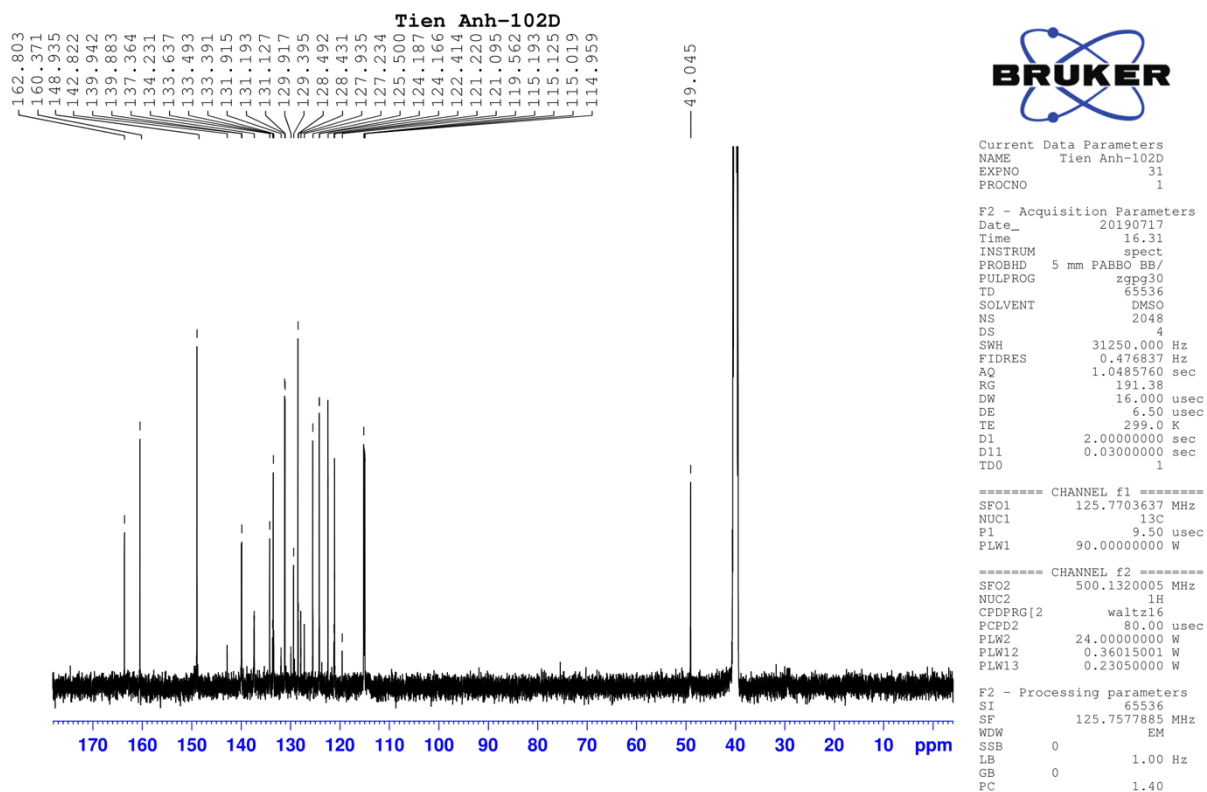

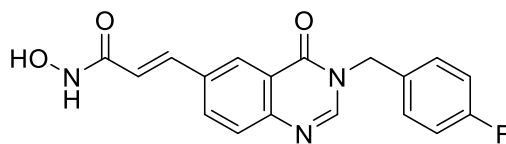

Figure S21. <sup>1</sup>H NMR of compound 9k

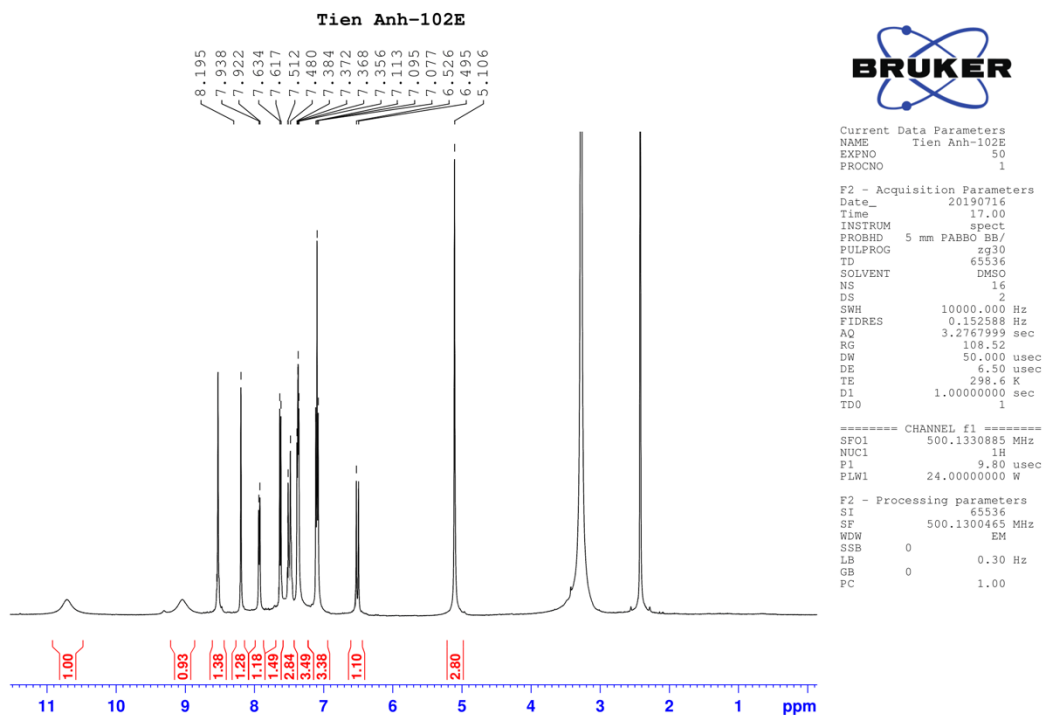

Figure S22. <sup>13</sup>C NMR of compound 9k

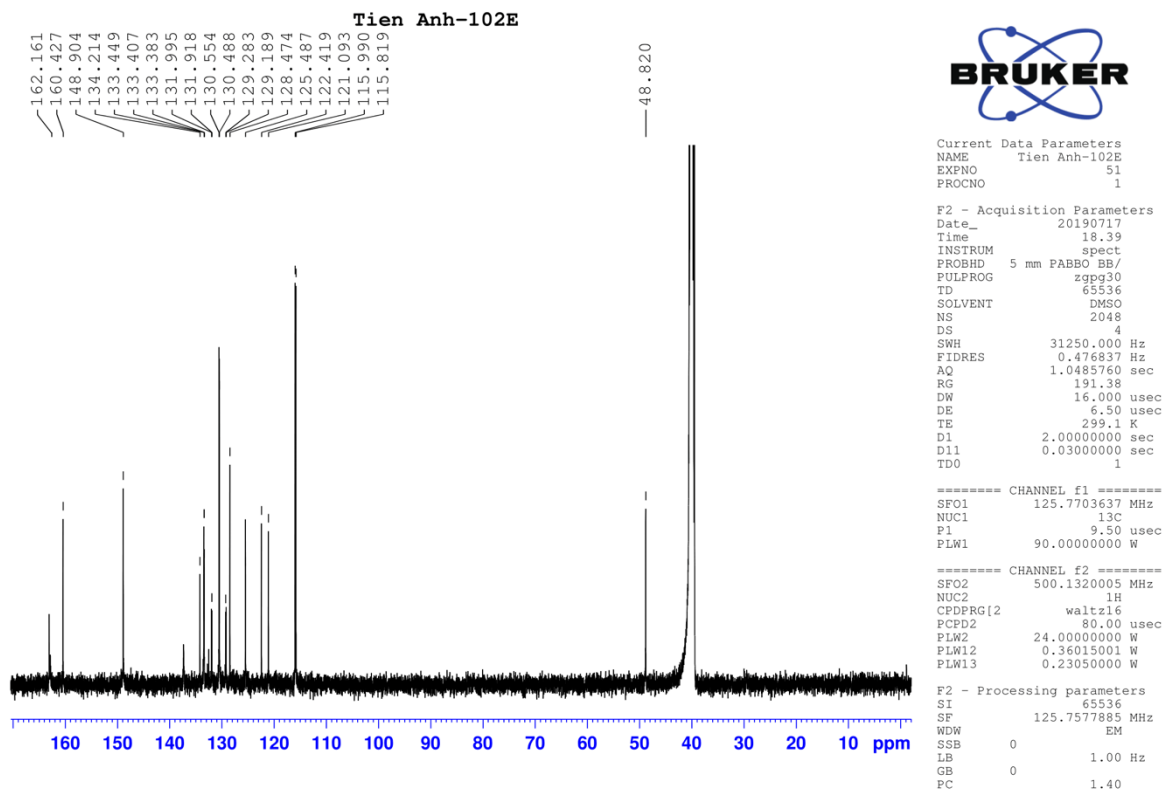

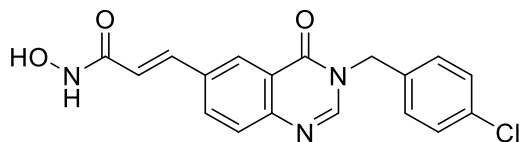

Figure S23. <sup>1</sup>H NMR of compound 91

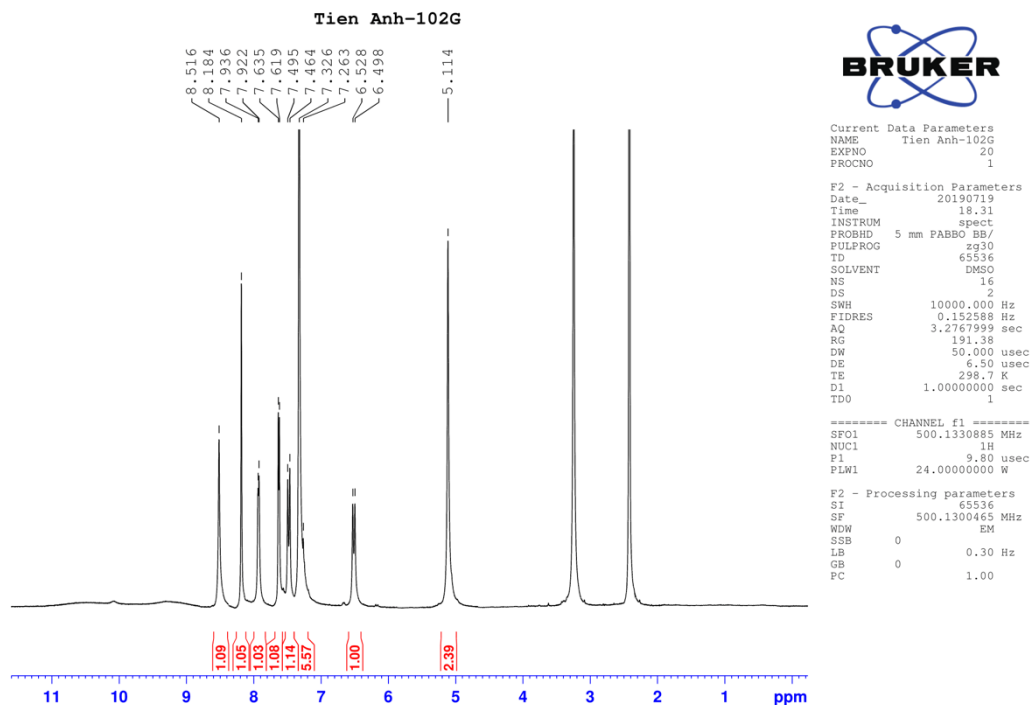

Figure S24. <sup>13</sup>C NMR of compound 91

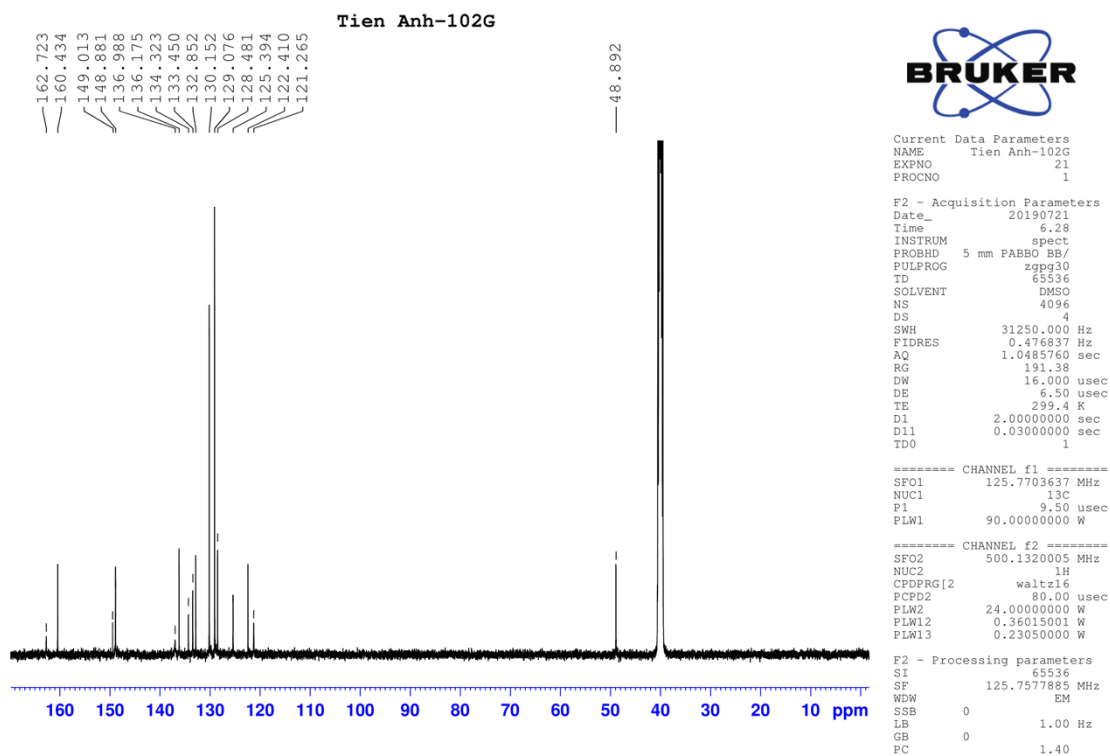

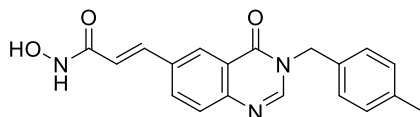

Figure S25. <sup>1</sup>H NMR of compound 9m

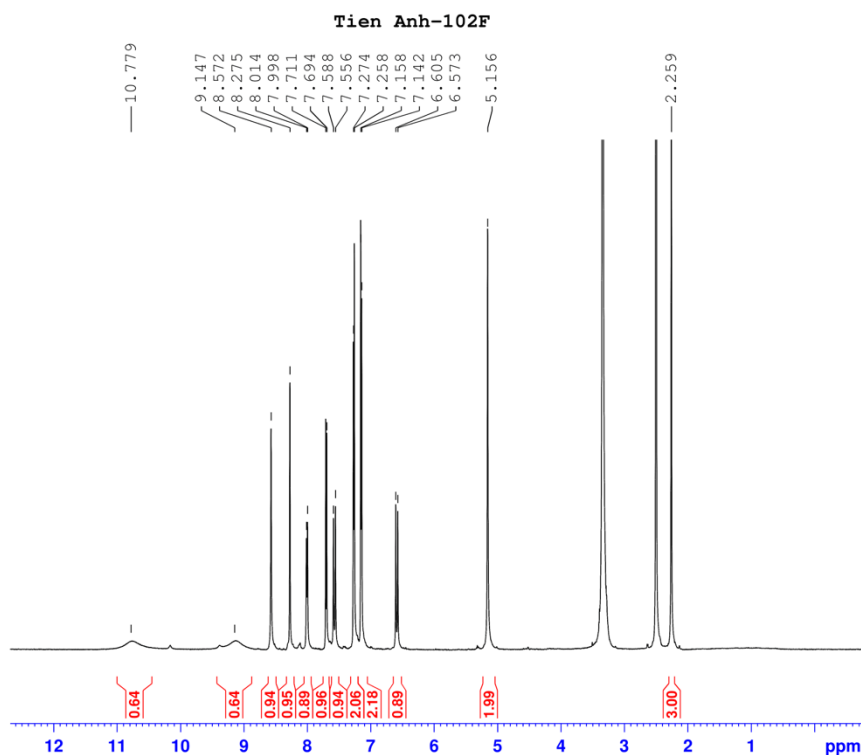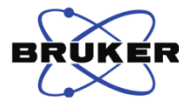

Current Data Parameters  
 NAME Tien Anh-102F  
 EXPNO 10  
 PROCNO 1

F2 - Acquisition Parameters  
 Date\_ 20190711  
 Time 12.09  
 INSTRUM spect  
 PROBHD 5 mm PABBO BB/  
 PULPROG zg30  
 TD 65536  
 SOLVENT DMSO  
 NS 16  
 DS 2  
 SWH 10000.000 Hz  
 FIDRES 0.152588 Hz  
 AQ 3.276799 sec  
 RG 138.87  
 DW 50.000 usec  
 DE 6.50 usec  
 TE 298.2 K  
 D1 1.00000000 sec  
 TDO 1

==== CHANNEL f1 =====  
 SF01 500.1330885 MHz  
 NUC1 1H  
 P1 9.80 usec  
 PLW1 24.00000000 W

F2 - Processing parameters  
 SI 65536  
 SF 500.1300053 MHz  
 WDW EM  
 SSB 0  
 LB 0.30 Hz  
 GB 0  
 PC 1.00

Figure S26. <sup>13</sup>C NMR of compound 9m

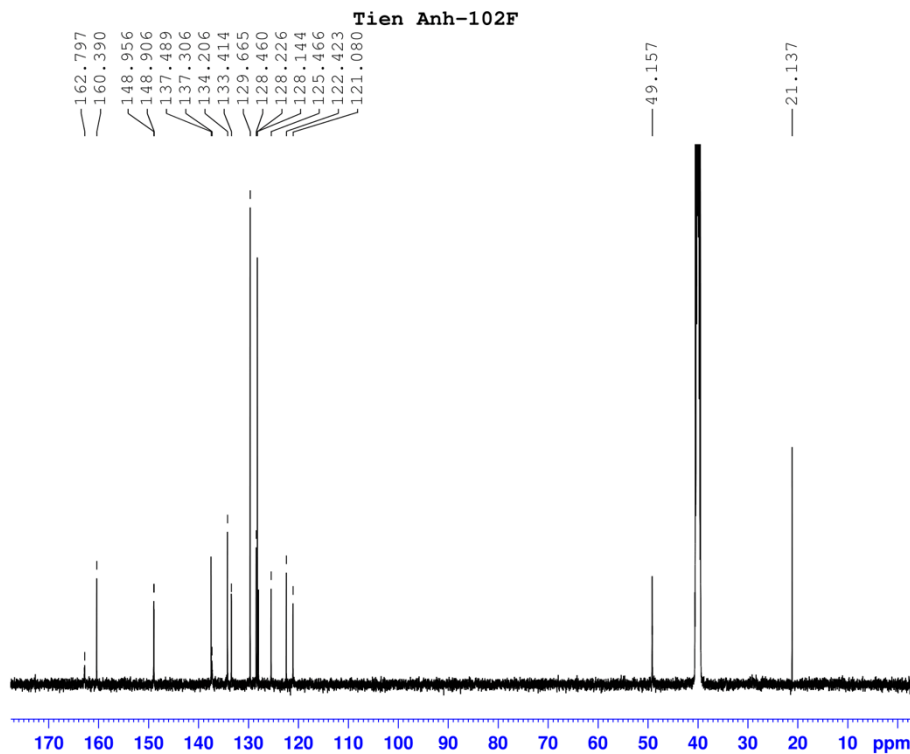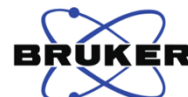

Current Data Parameters  
 NAME Tien Anh-102F  
 EXPNO 11  
 PROCNO 1

F2 - Acquisition Parameters  
 Date\_ 20190712  
 Time 0.29  
 INSTRUM spect  
 PROBHD 5 mm PABBO BB/  
 PULPROG zgpg30  
 TD 65536  
 SOLVENT DMSO  
 NS 4096  
 DS 4  
 SWH 31250.000 Hz  
 FIDRES 0.476837 Hz  
 AQ 1.0485760 sec  
 RG 191.38  
 DW 16.000 usec  
 DE 6.50 usec  
 TE 299.2 K  
 D1 2.00000000 sec  
 D11 0.03000000 sec  
 TDO 1

==== CHANNEL f1 =====  
 SF01 125.7703637 MHz  
 NUC1 13C  
 P1 9.50 usec  
 PLW1 90.00000000 W

==== CHANNEL f2 =====  
 SF02 500.1320005 MHz  
 NUC2 1H  
 CPDPRG[2] waltz16  
 PCPD2 80.00 usec  
 PLW2 24.00000000 W  
 PLW12 0.36015001 W  
 PLW13 0.23050000 W

F2 - Processing parameters  
 SI 65536  
 SF 125.7577885 MHz  
 WDW EM  
 SSB 0  
 LB 1.00 Hz  
 GB 0  
 PC 1.40



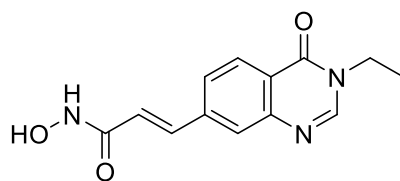

Figure S27. <sup>1</sup>H NMR of compound 10a

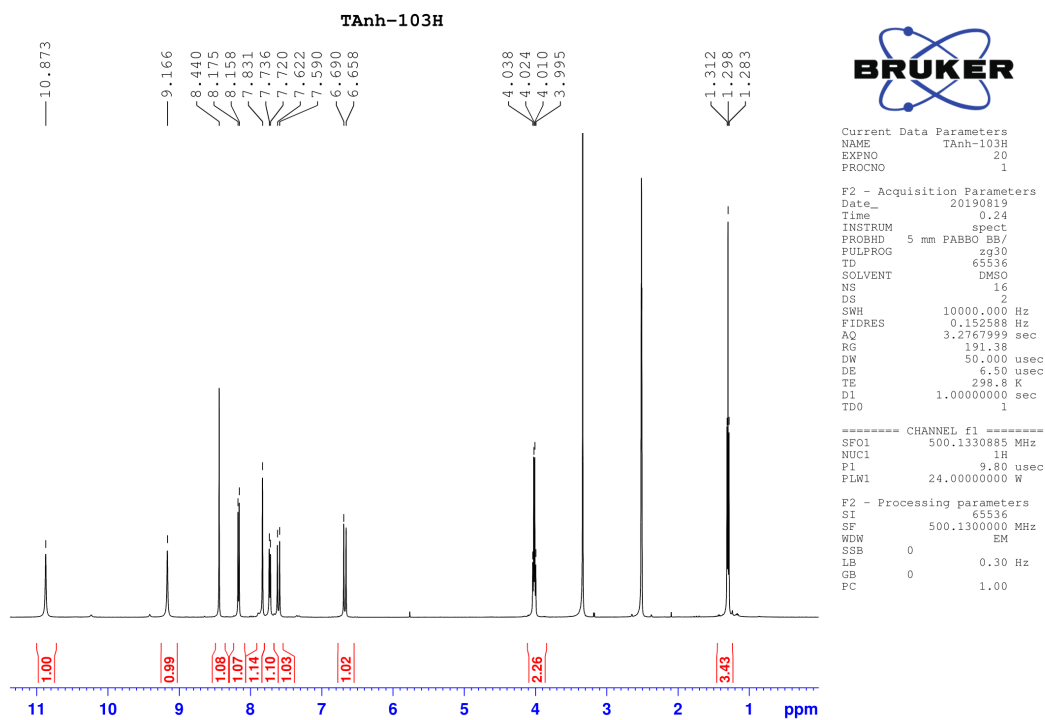

Figure S28. <sup>13</sup>C NMR of compound 10a

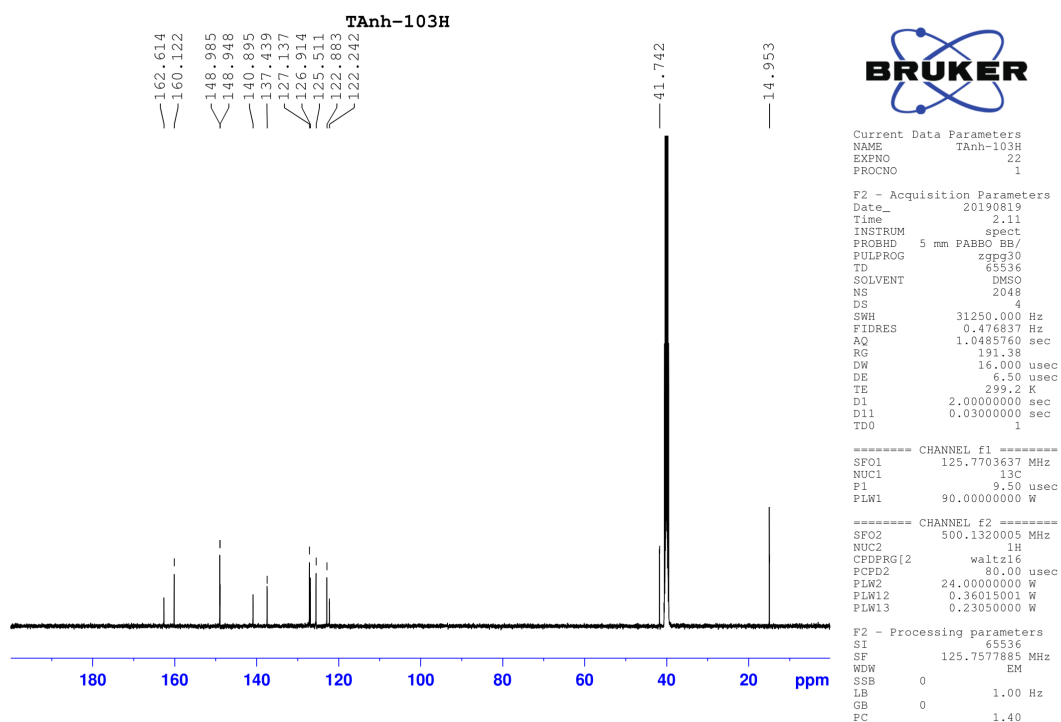

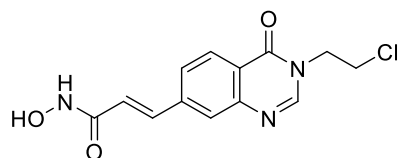

Figure S29. <sup>1</sup>H NMR of compound 10b

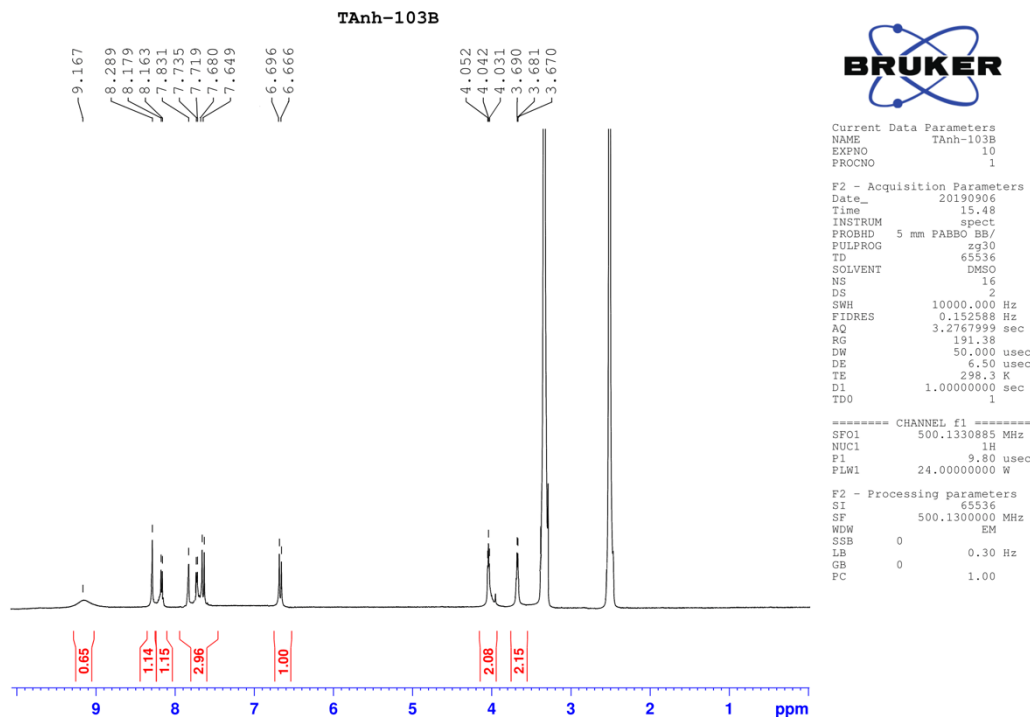

Figure S30. <sup>13</sup>C NMR of compound 10b

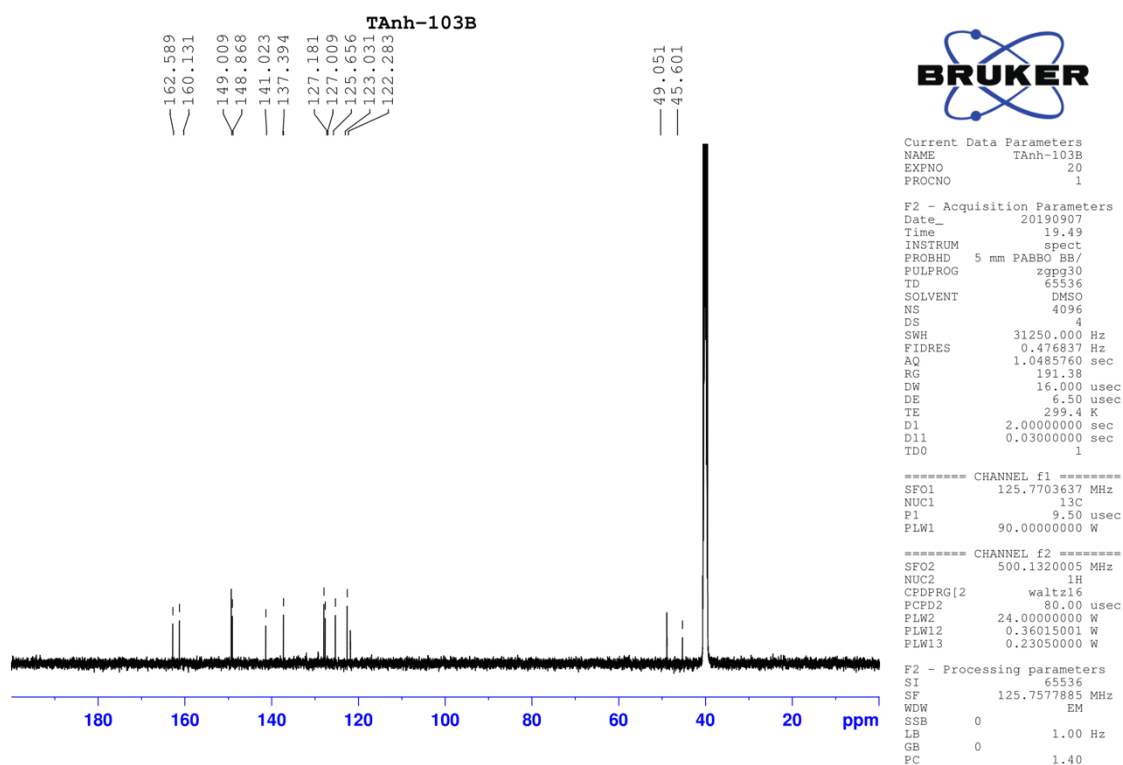

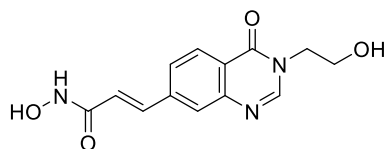

Figure S31. <sup>1</sup>H NMR of compound 10c

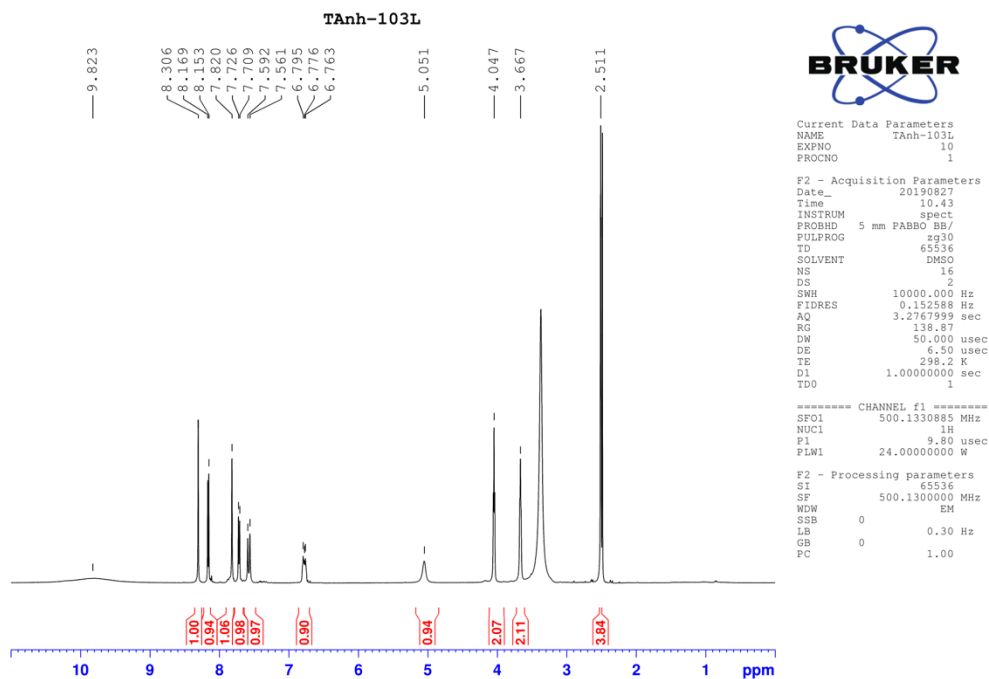

Figure S32. <sup>13</sup>C NMR of compound 10c

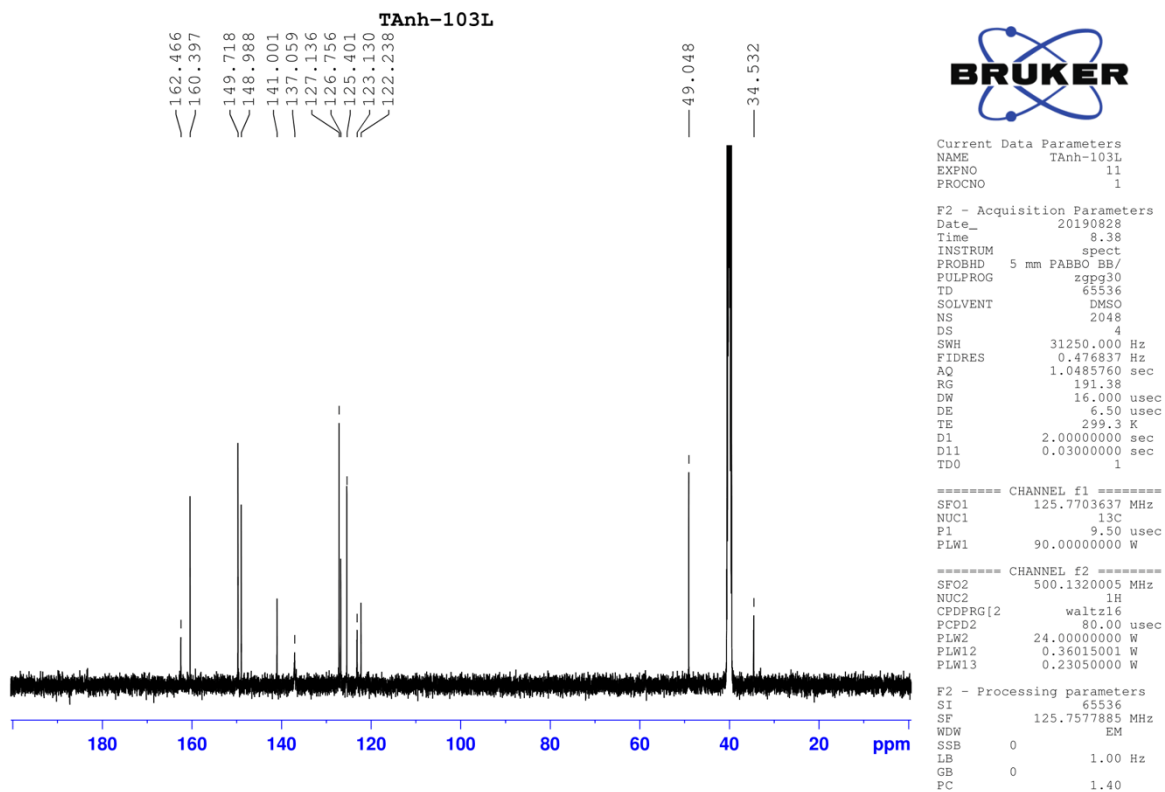

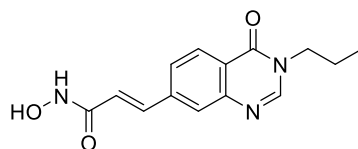

Figure S33. <sup>1</sup>H NMR of compound 10d

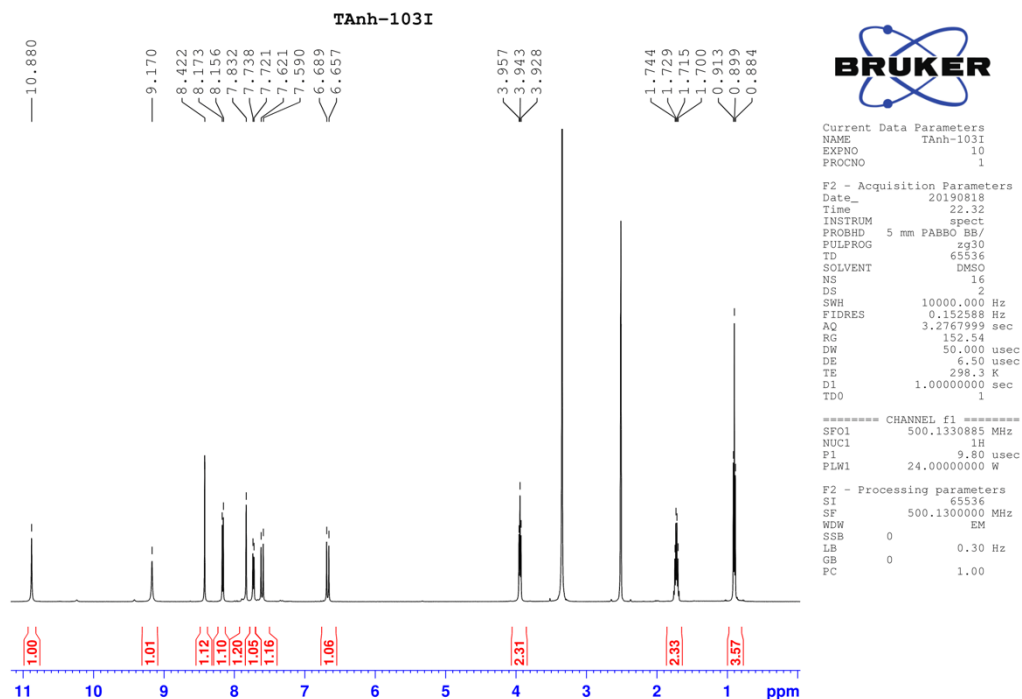

Figure S34. <sup>13</sup>C NMR of compound 10d

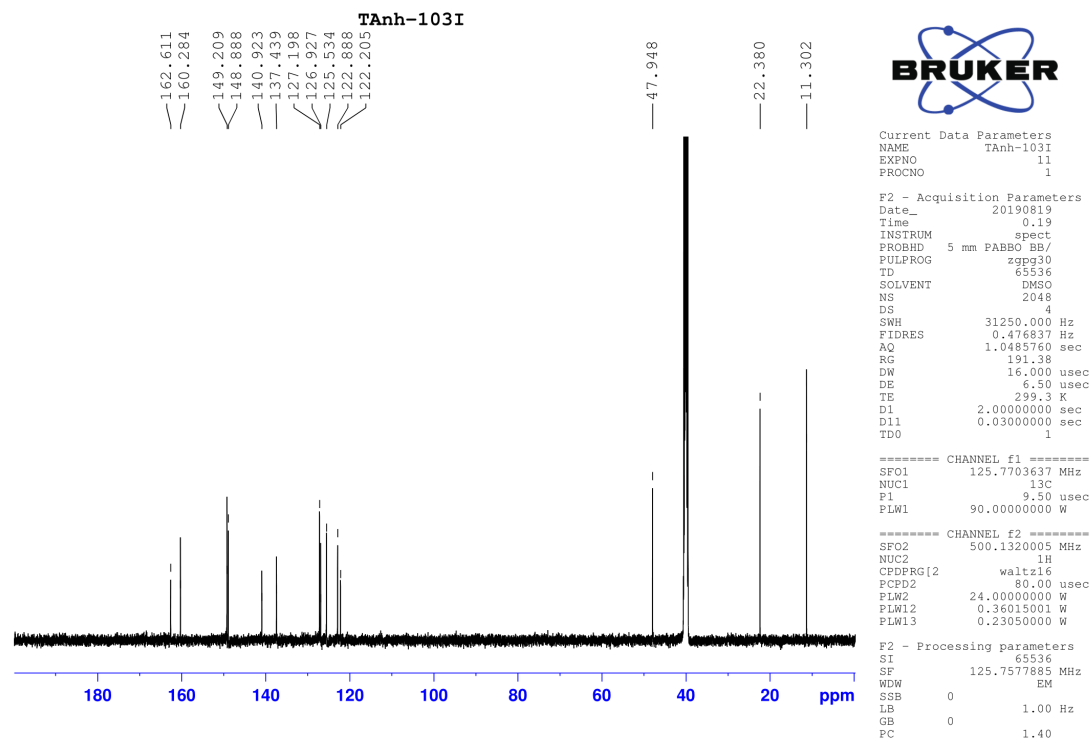

Figure S35. <sup>1</sup>H NMR of compound 10e

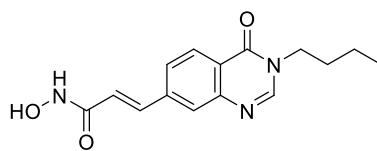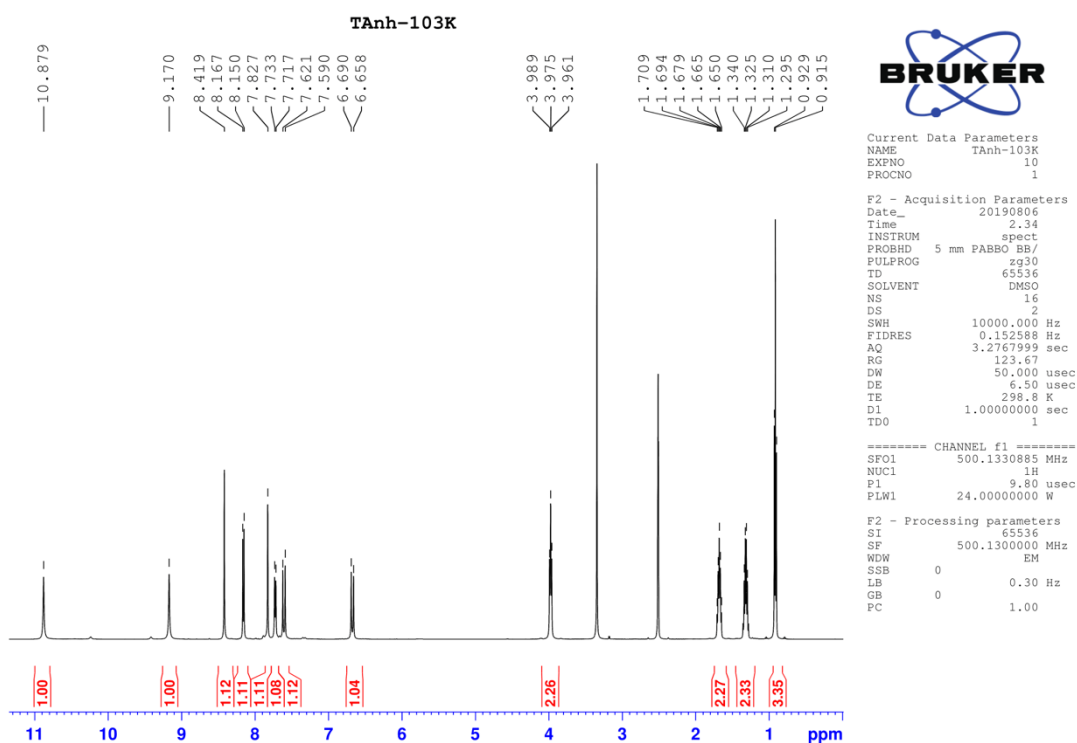

Figure S36. <sup>13</sup>C NMR of compound 10e

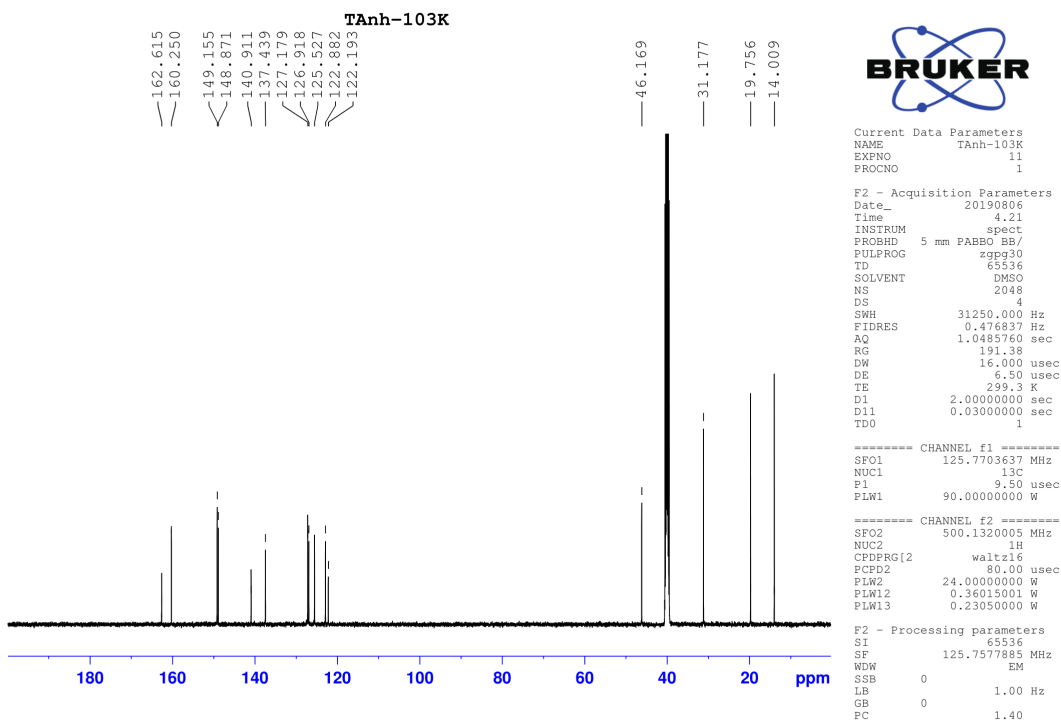

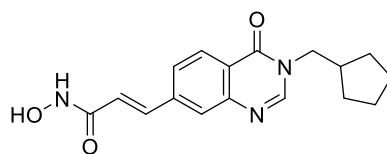

Figure S37. <sup>1</sup>H NMR of compound 10f

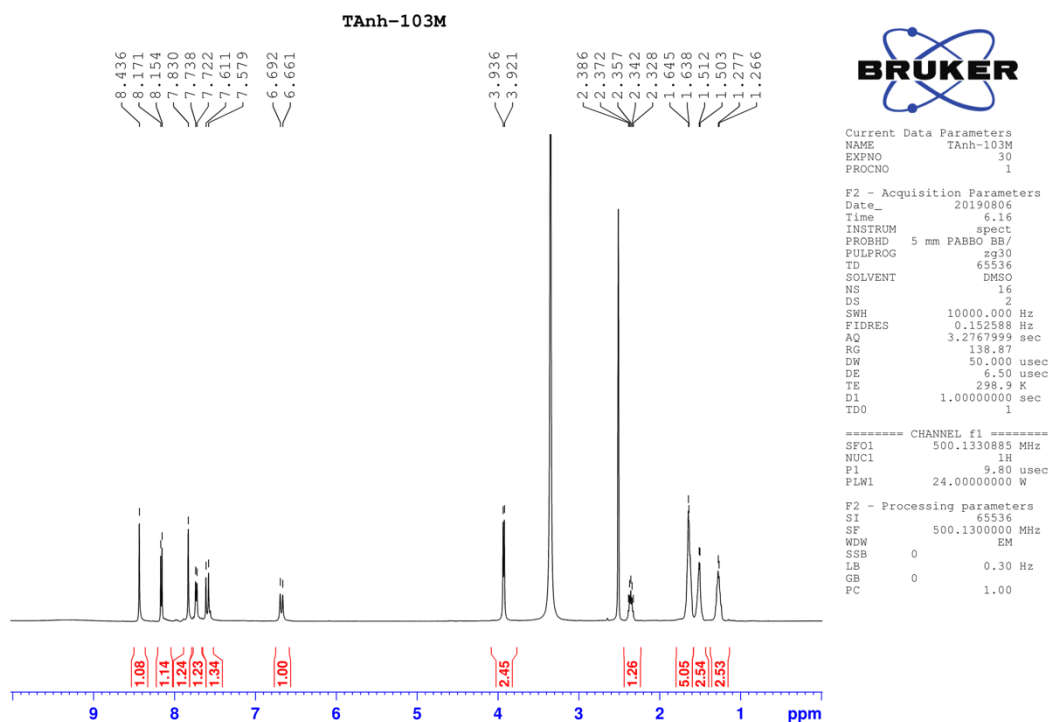

Figure S38. <sup>13</sup>C NMR of compound 10f

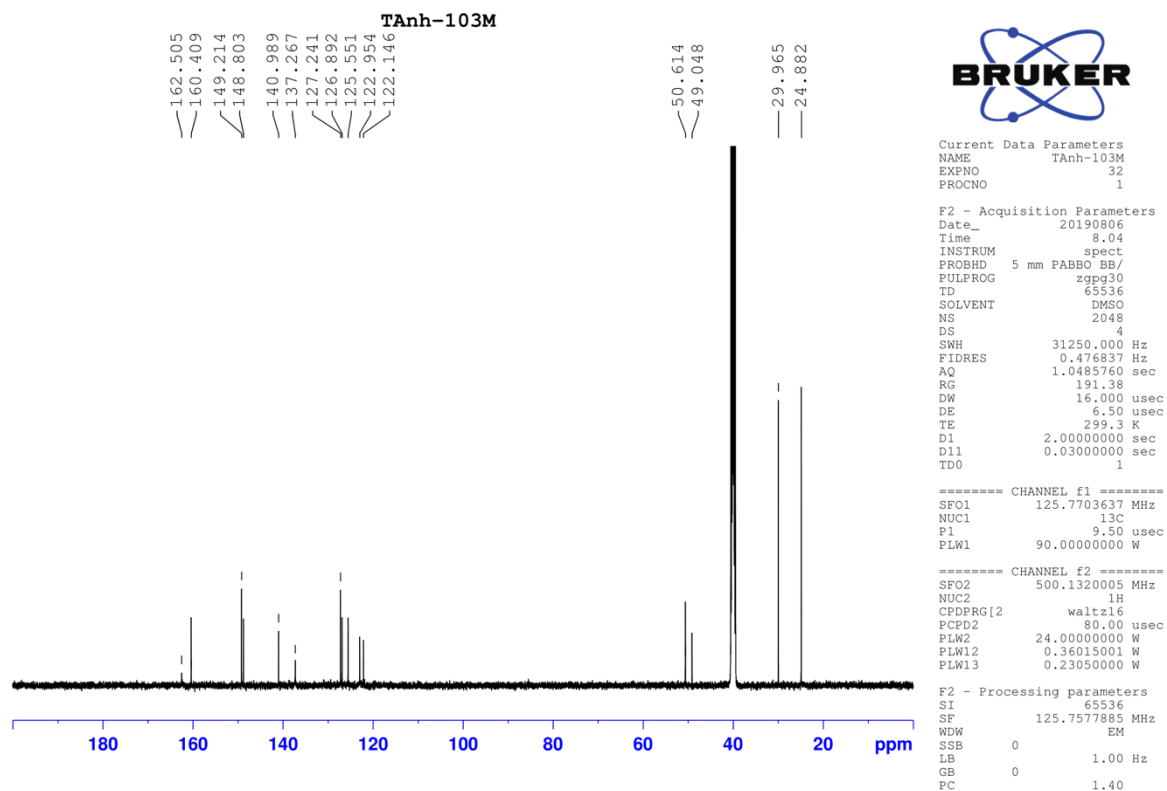

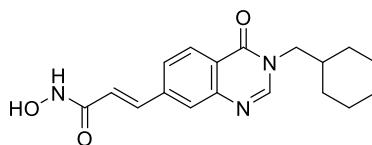

Figure S39. <sup>1</sup>H NMR of compound 10g

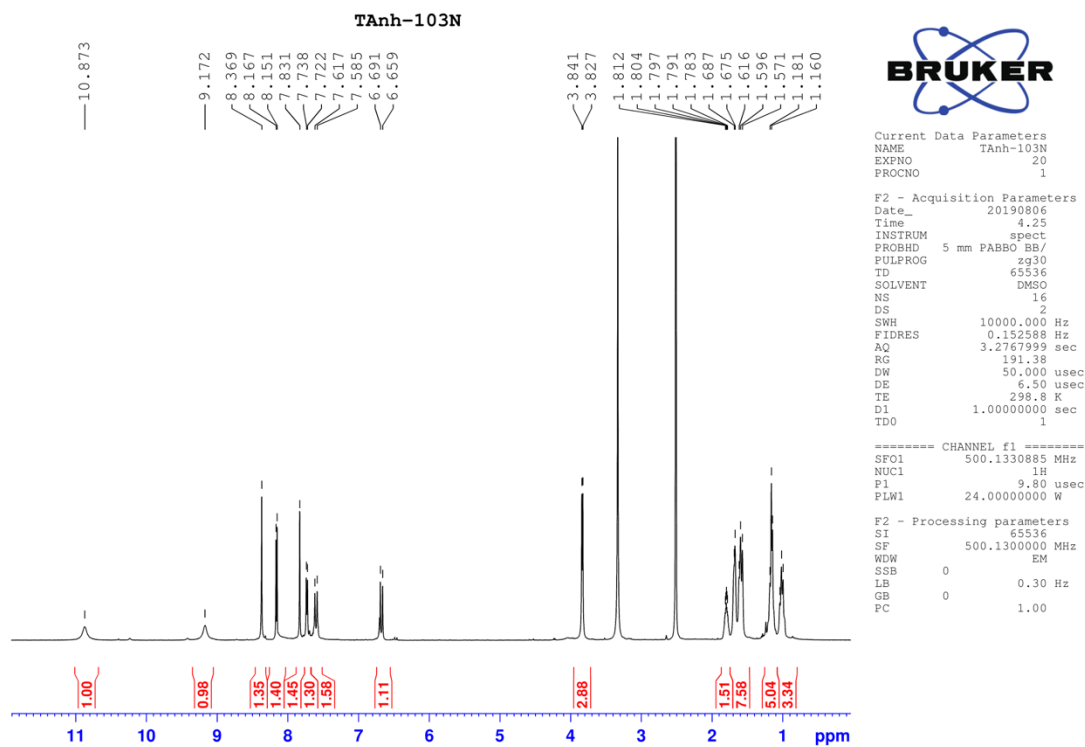

Figure S40. <sup>13</sup>C NMR of compound 10g

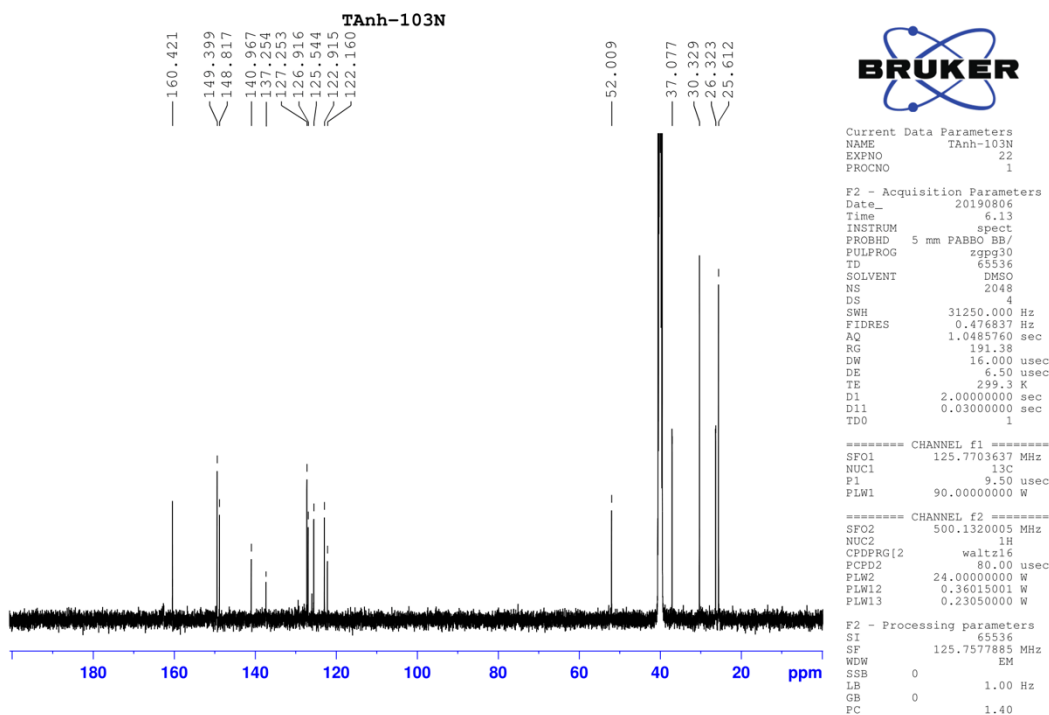

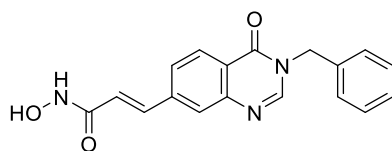

Figure S41. <sup>1</sup>H NMR of compound 10h

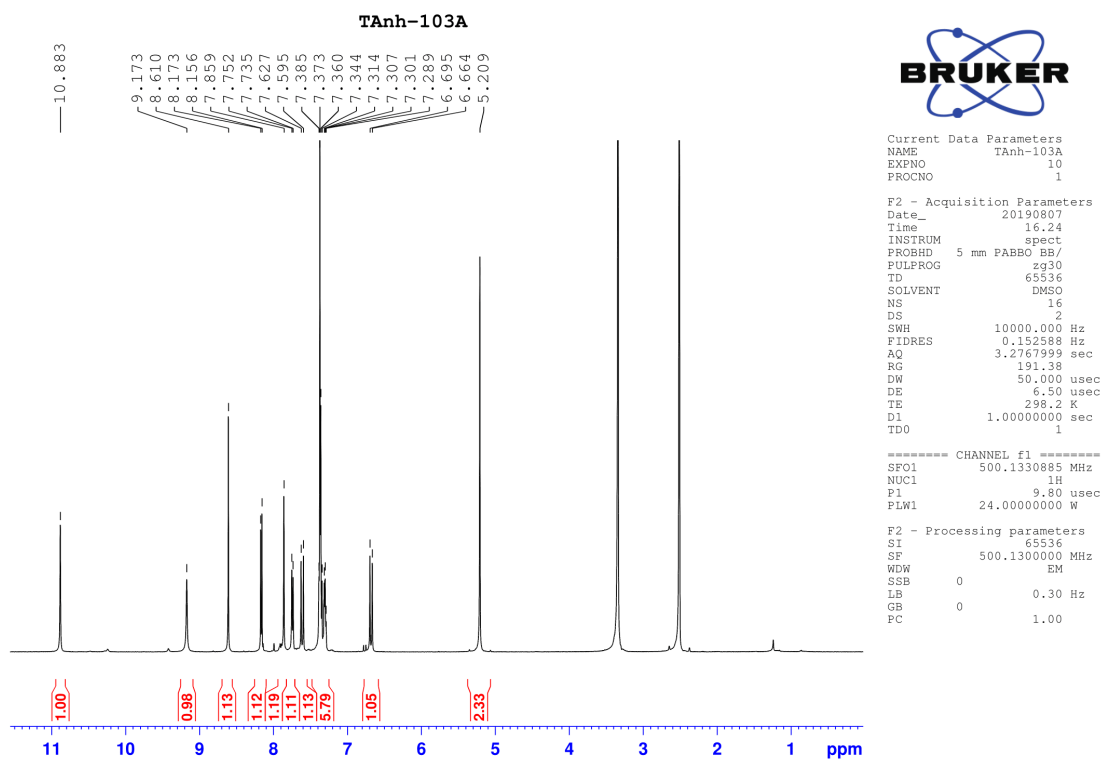

Figure S42. <sup>13</sup>C NMR of compound 10h

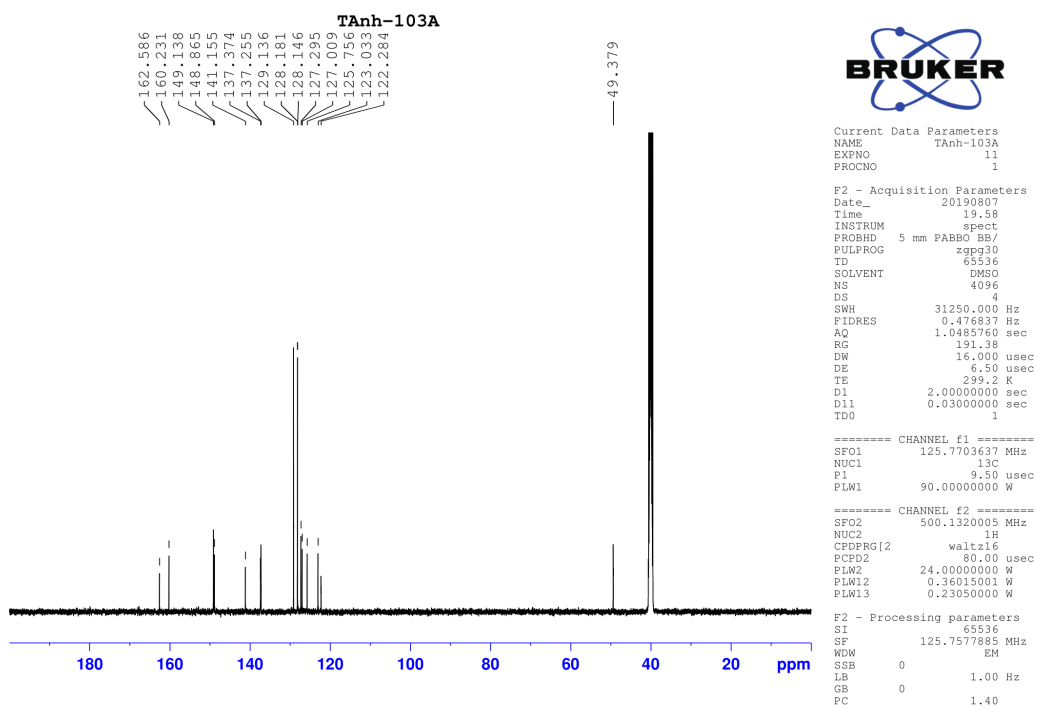



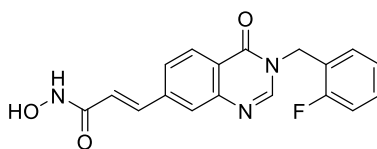

Figure S43. <sup>1</sup>H NMR of compound 10i

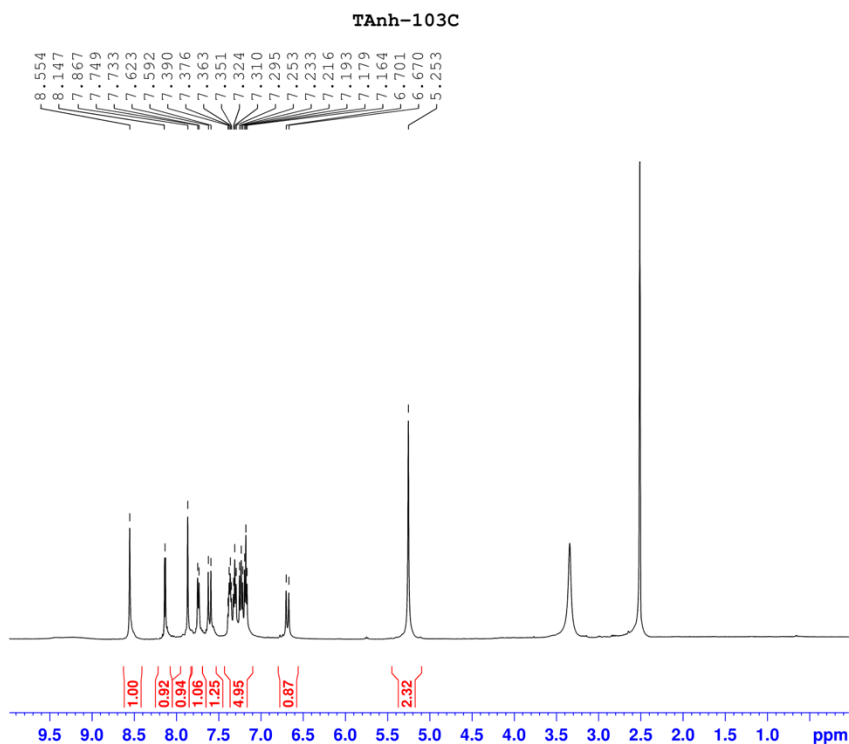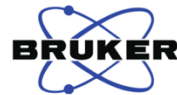

Current Data Parameters  
 NAME TAnh-103C  
 EXPNO 20  
 PROCNO 1

F2 - Acquisition Parameters  
 Date\_ 20190807  
 Time 20.02  
 INSTRUM spect  
 PROBHD 5 mm PABBO BB/  
 PULPROG zg30  
 TD 65536  
 SOLVENT DMSO  
 NS 16  
 DS 2  
 SWH 10000.000 Hz  
 FIDRES 0.152588 Hz  
 AQ 3.2767999 sec  
 RG 138.87  
 DW 50.000 usec  
 DE 6.50 usec  
 TE 298.7 K  
 D1 1.00000000 sec  
 TD0 1

==== CHANNEL f1 =====  
 SF01 500.1330885 MHz  
 NUC1 1H  
 P1 9.80 usec  
 PLW1 24.00000000 W

F2 - Processing parameters  
 SI 65536  
 SF 500.1330000 MHz  
 WDW EM  
 SSB 0  
 LB 0.30 Hz  
 GB 0  
 PC 1.00

Figure S44. <sup>13</sup>C NMR of compound 10i

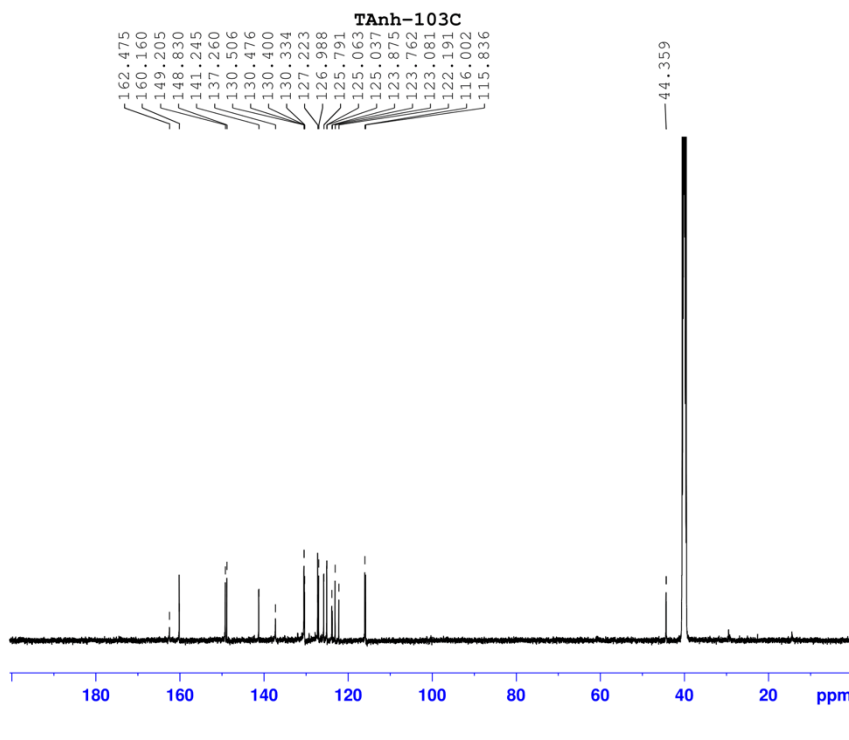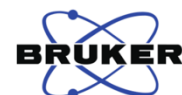

Current Data Parameters  
 NAME TAnh-103C  
 EXPNO 22  
 PROCNO 1

F2 - Acquisition Parameters  
 Date\_ 20190807  
 Time 23.36  
 INSTRUM spect  
 PROBHD 5 mm PABBO BB/  
 PULPROG zgpg30  
 TD 65536  
 SOLVENT DMSO  
 NS 4096  
 DS 4  
 SWH 31250.000 Hz  
 FIDRES 0.476837 Hz  
 AQ 1.0485760 sec  
 RG 191.38  
 DW 16.000 usec  
 DE 6.50 usec  
 TE 299.2 K  
 D1 2.00000000 sec  
 D11 0.03000000 sec  
 TD0 1

==== CHANNEL f1 =====  
 SF01 125.7703637 MHz  
 NUC1 13C  
 P1 9.50 usec  
 PLW1 90.00000000 W

==== CHANNEL f2 =====  
 SF02 500.1320005 MHz  
 NUC2 1H  
 CPDPRG2 waltz16  
 PCPD2 80.00 usec  
 PLW2 24.00000000 W  
 PLW12 0.36015001 W  
 PLW13 0.23050000 W

F2 - Processing parameters  
 SI 65536  
 SF 125.7577888 MHz  
 WDW EM  
 SSB 0  
 LB 1.00 Hz  
 GB 0  
 PC 1.40

Figure S45. <sup>1</sup>H NMR of compound 10j

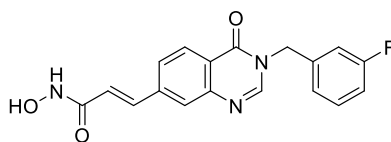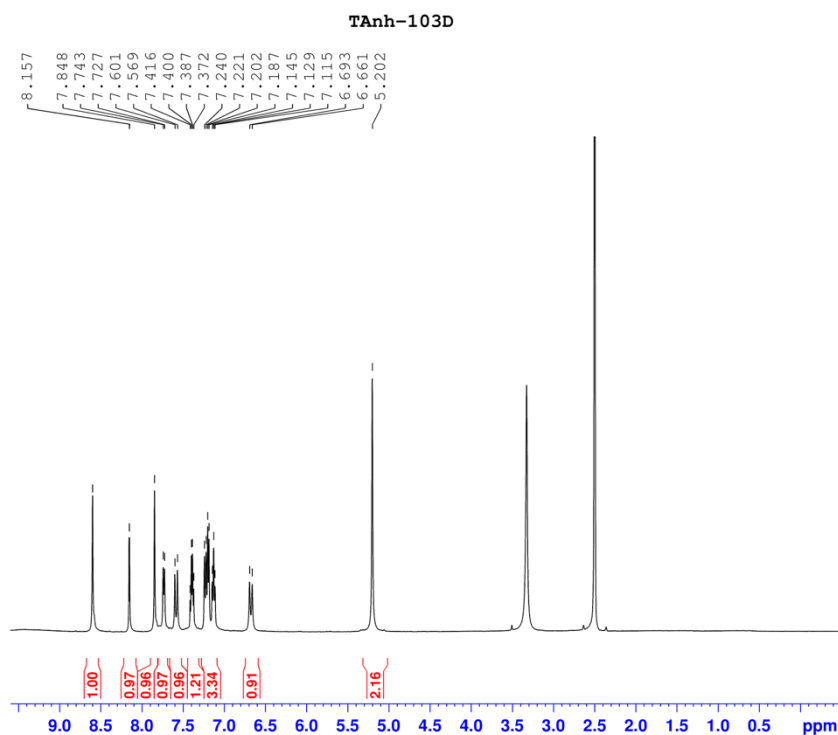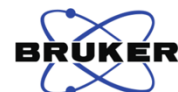

Current Data Parameters  
 NAME TAnh-103D  
 EXPNO 20  
 PROCNO 1

F2 - Acquisition Parameters  
 Date\_ 20190730  
 Time 14.56  
 INSTRUM spect  
 PROBHD 5 mm PABBO BB/  
 PULPROG zg30  
 TD 65536  
 SOLVENT DMF  
 NS 16  
 DS 2  
 SWH 10000.000 Hz  
 FIDRES 0.152588 Hz  
 AQ 3.2767999 sec  
 RG 191.38  
 DW 50.000 usec  
 DE 6.50 usec  
 TE 298.2 K  
 D1 1.00000000 sec  
 TD0 1

==== CHANNEL f1 =====  
 SFO1 500.1330885 MHz  
 NUC1 1H  
 P1 9.80 usec  
 PLW1 24.00000000 W

F2 - Processing parameters  
 SI 65536  
 SF 500.1302158 MHz  
 WDW EM  
 SSB 0  
 LB 0.30 Hz  
 GB 0  
 PC 1.00

Figure S46. <sup>13</sup>C NMR of compound 10j

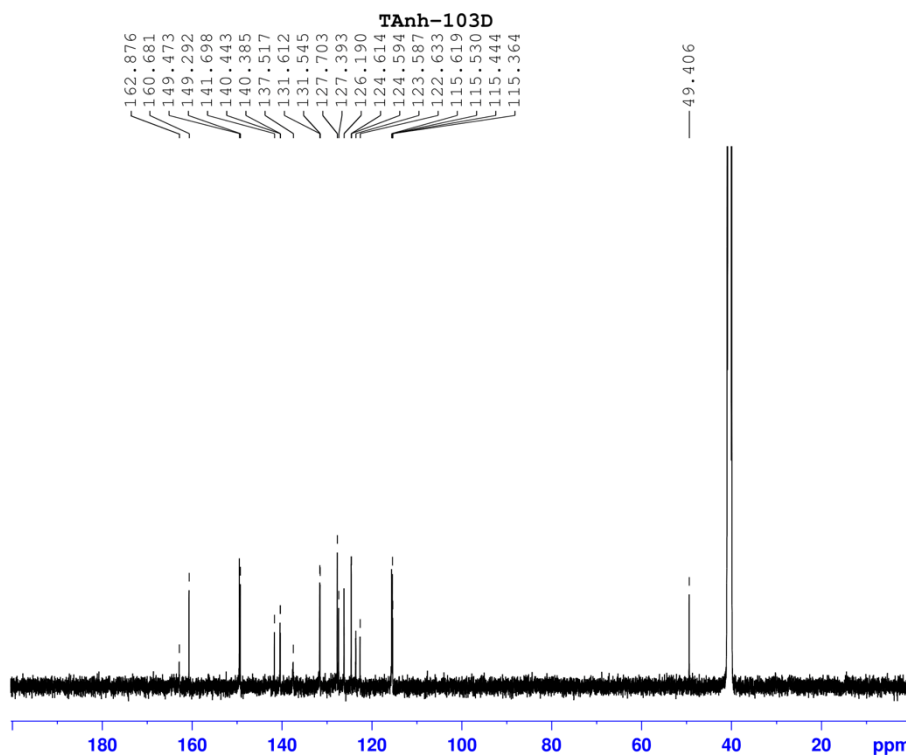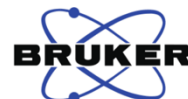

Current Data Parameters  
 NAME TAnh-103D  
 EXPNO 21  
 PROCNO 1

F2 - Acquisition Parameters  
 Date\_ 20190731  
 Time 0.29  
 INSTRUM spect  
 PROBHD 5 mm PABBO BB/  
 PULPROG zgpg30  
 TD 65536  
 SOLVENT DMF  
 NS 2048  
 DS 4  
 SWH 31250.000 Hz  
 FIDRES 0.476837 Hz  
 AQ 1.0485760 sec  
 RG 191.38  
 DW 16.000 usec  
 DE 6.50 usec  
 TE 299.6 K  
 D1 2.00000000 sec  
 D11 0.03000000 sec  
 TD0 1

==== CHANNEL f1 =====  
 SFO1 125.7703637 MHz  
 NUC1 13C  
 P1 9.50 usec  
 PLW1 90.00000000 W

==== CHANNEL f2 =====  
 SFO2 500.1320005 MHz  
 NUC2 1H  
 CPDPRG[2] waltz16  
 PCPD2 80.00 usec  
 PLW2 24.00000000 W  
 PLW12 0.36015001 W  
 PLW13 0.23050000 W

F2 - Processing parameters  
 SI 65536  
 SF 125.7577885 MHz  
 WDW EM  
 SSB 0  
 LB 1.00 Hz  
 GB 0  
 PC 1.40

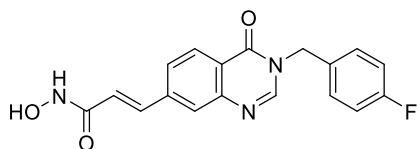

Figure S47. <sup>1</sup>H NMR of compound 10k

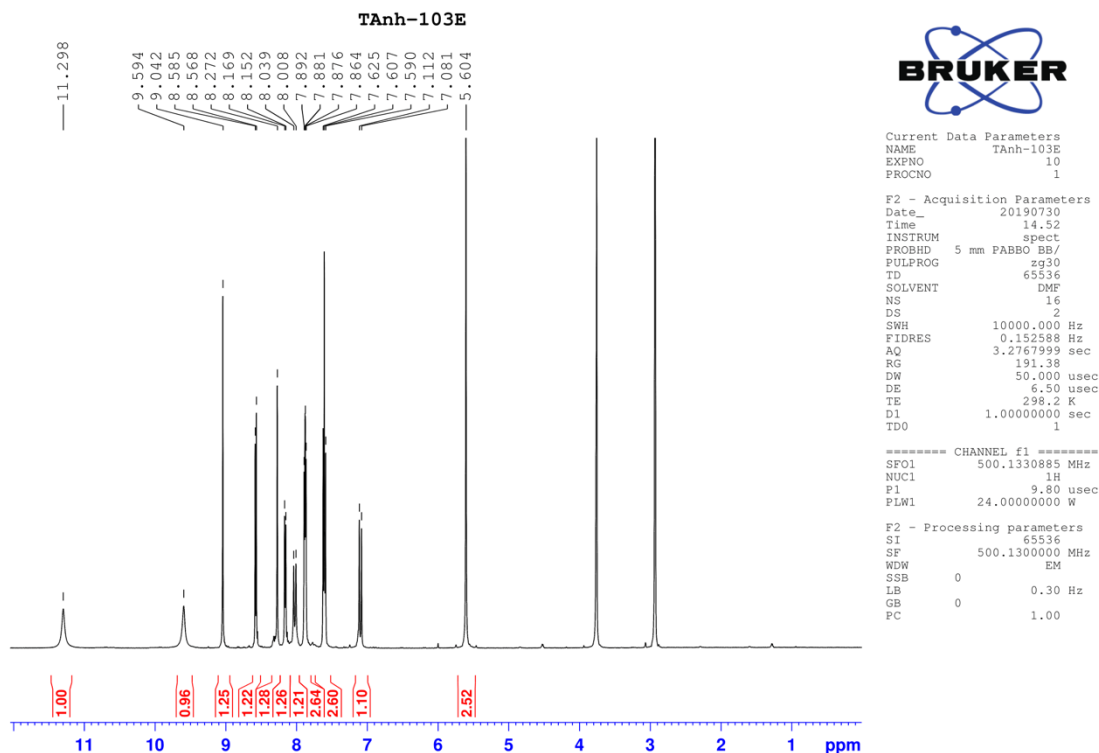

Figure S48. <sup>13</sup>C NMR of compound 10k

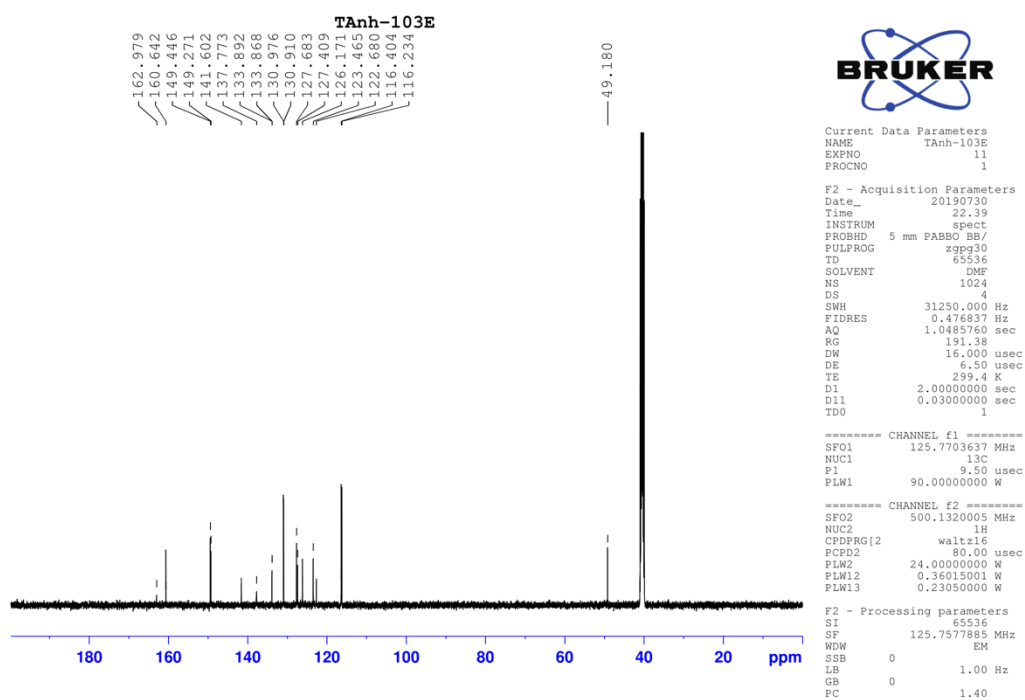

Figure S49. <sup>1</sup>H NMR of compound 10I

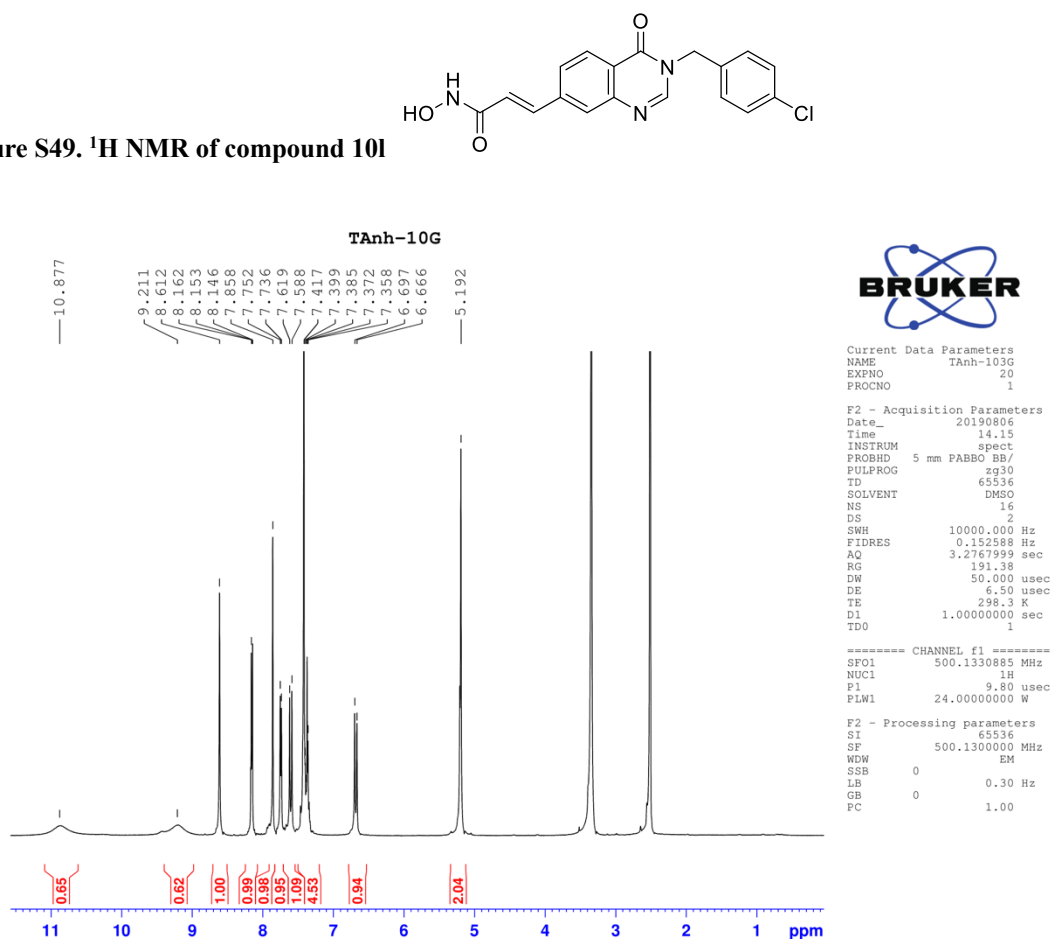

Figure S50. <sup>13</sup>C NMR of compound 10I

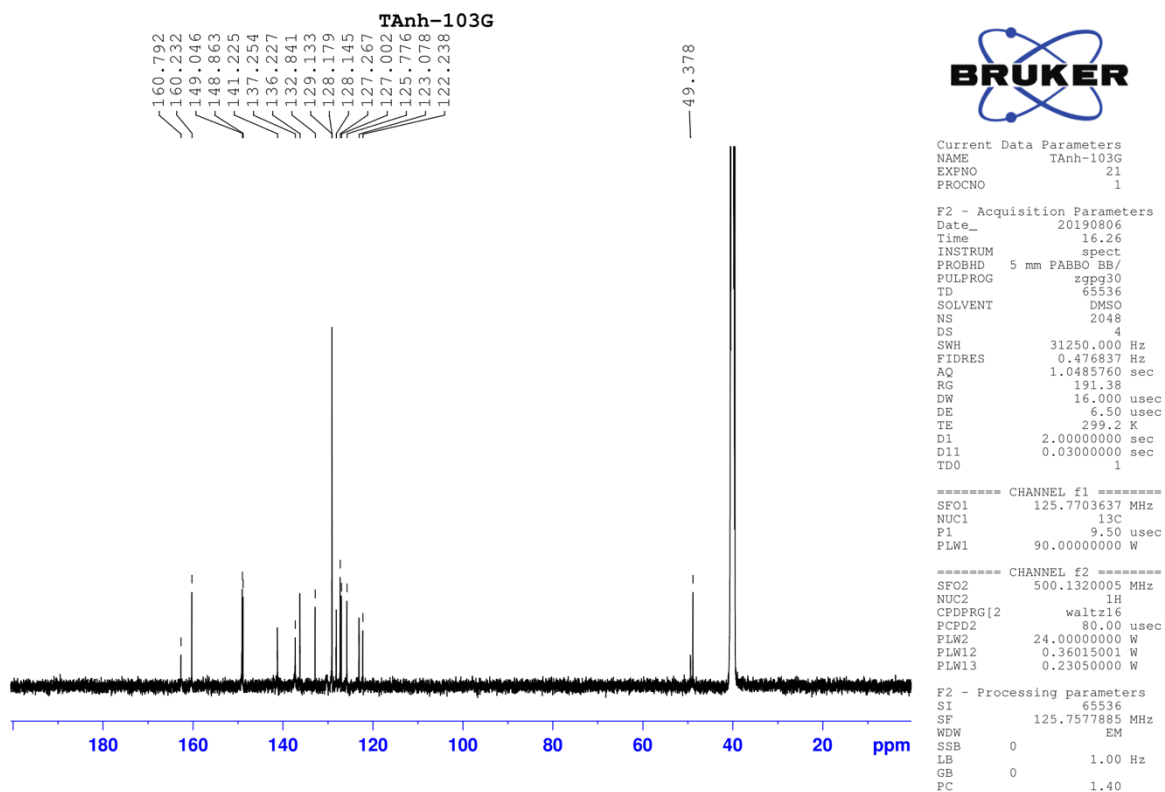

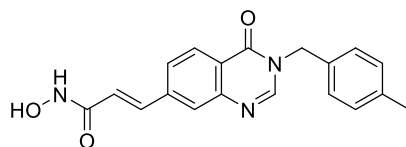

Figure S51. <sup>1</sup>H NMR of compound 10m

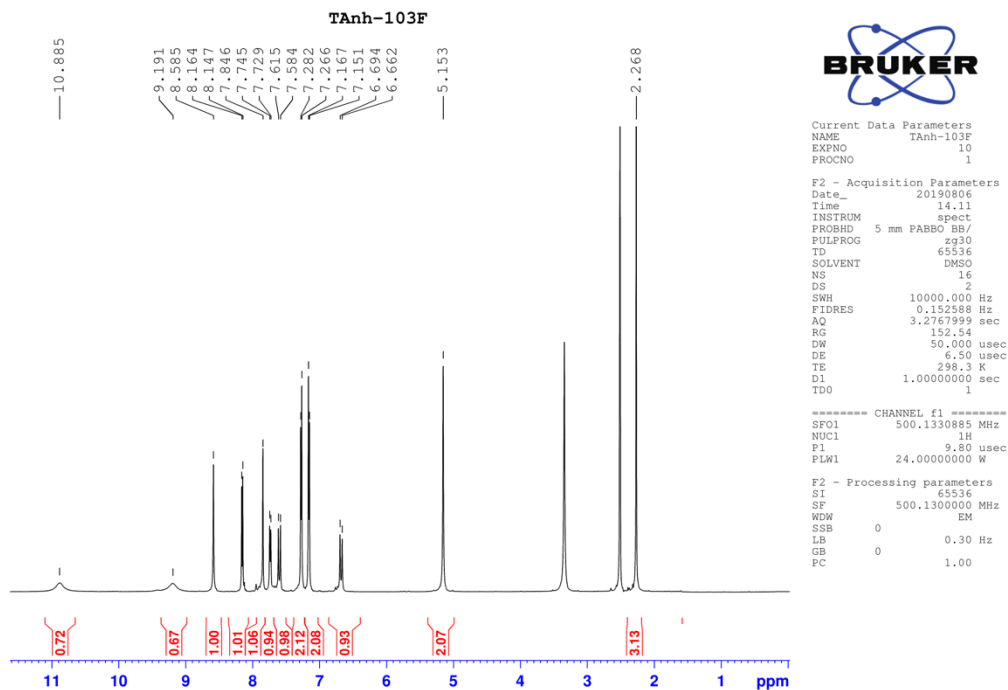

Figure S52. <sup>13</sup>C NMR of compound 10m

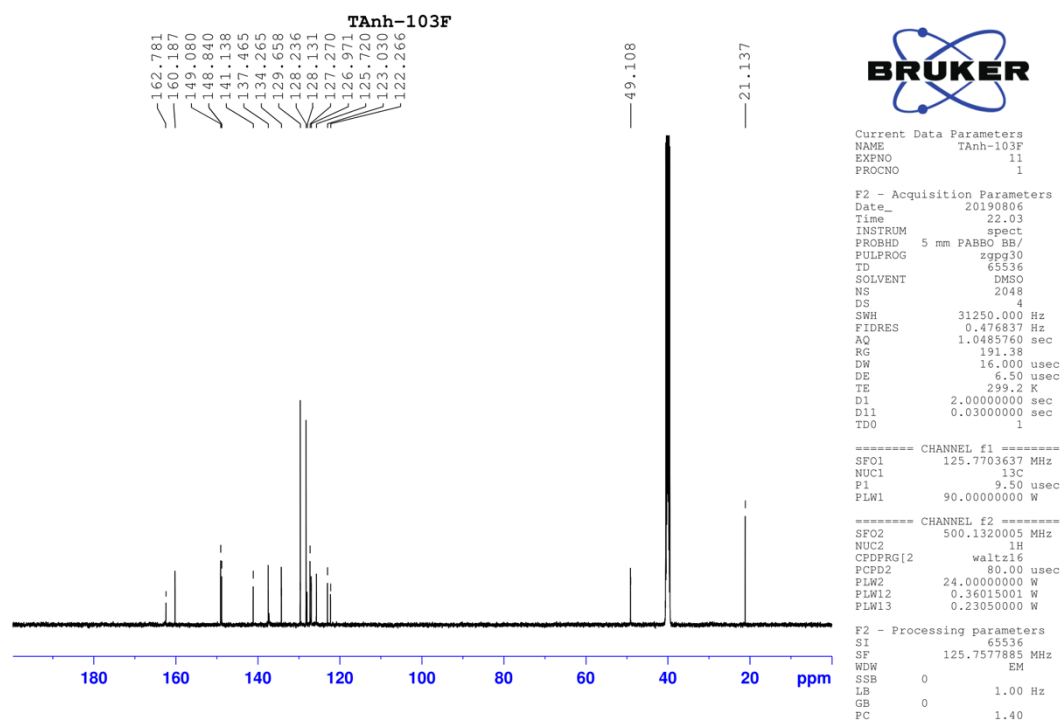

Supplement: ao0c05870_si_001.pdf [file ao0c05870_si_001.pdf]
